1 **The Origin and Early Evolution of the Legumes are a**  
2 **Complex Paleopolyploid Phylogenomic Tangle closely**  
3 **associated with the Cretaceous-Paleogene (K-Pg) Boundary**  
4

5 Running head:  
6 Phylogenomic complexity and polyploidy in legumes  
7

8 Authors:

9 Erik J.M. Koenen<sup>1\*</sup>, Dario I. Ojeda<sup>2,3</sup>, Royce Steeves<sup>4,5</sup>, Jérémy Migliore<sup>2</sup>, Freek T.  
10 Bakker<sup>6</sup>, Jan J. Wieringa<sup>7</sup>, Catherine Kidner<sup>8,9</sup>, Olivier Hardy<sup>2</sup>, R. Toby Pennington<sup>8,10</sup>,  
11 Patrick S. Herendeen<sup>11</sup>, Anne Bruneau<sup>4</sup> and Colin E. Hughes<sup>1</sup>  
12

13 <sup>1</sup> Department of Systematic and Evolutionary Botany, University of Zurich,  
14 Zollikerstrasse 107, CH-8008, Zurich, Switzerland

15 <sup>2</sup> Service Évolution Biologique et Écologie, Faculté des Sciences, Université Libre de  
16 Bruxelles, Avenue Franklin Roosevelt 50, 1050, Brussels, Belgium

17 <sup>3</sup> Norwegian Institute of Bioeconomy Research, Høgskoleveien 8, 1433 Ås, Norway

18 <sup>4</sup> Institut de Recherche en Biologie Végétale and Département de Sciences Biologiques,  
19 Université de Montréal, 4101 Sherbrooke St E, Montreal, QC H1X 2B2, Canada

20 <sup>5</sup> Fisheries & Oceans Canada, Gulf Fisheries Center, 343 Université Ave, Moncton, NB  
21 E1C 5K4, Canada

22 <sup>6</sup> Biosystematics Group, Wageningen University, Droevendaalsesteeg 1, 6708 PB,  
23 Wageningen, The Netherlands

24 <sup>7</sup> Naturalis Biodiversity Center, Leiden, Darwinweg 2, 2333 CR, Leiden, The Netherlands

25 <sup>8</sup> Royal Botanic Gardens, 20a Inverleith Row, Edinburgh EH3 5LR, U.K.

26 <sup>9</sup> School of Biological Sciences, University of Edinburgh, King's Buildings, Mayfield Rd,  
27 Edinburgh, UK

28 <sup>10</sup> Geography, University of Exeter, Amory Building, Rennes Drive, Exeter, EX4 4RJ,  
29 U.K.

30 <sup>11</sup> Chicago Botanic Garden, 1000 Lake Cook Rd, Glencoe, IL 60022, U.S.A.  
31

32 \* Correspondence to be sent to: Zollikerstrasse 107, CH-8008, Zurich, Switzerland;  
33 phone: +41 (0)44 634 84 16; email: [erik.koenen@systbot.uzh.ch](mailto:erik.koenen@systbot.uzh.ch).  
34

1 KOENEN ET AL.

35 *Abstract* – The consequences of the Cretaceous-Paleogene (K-Pg) boundary (KPB)  
36 mass extinction for the evolution of plant diversity are poorly understood, even although  
37 evolutionary turnover of plant lineages at the KPB is central to understanding the  
38 assembly of the Cenozoic biota. One aspect that has received considerable attention is  
39 the apparent concentration of whole genome duplication (WGD) events around the  
40 KPB, which may have played a role in survival and subsequent diversification of plant  
41 lineages. In order to gain new insights into the origins of Cenozoic biodiversity, we  
42 examine the origin and early evolution of the legume family, one of the most important  
43 angiosperm clades that rose to prominence after the KPB and for which multiple WGD  
44 events are found to have occurred early in its evolution. The legume family  
45 (Leguminosae or Fabaceae), with c. 20.000 species, is the third largest family of  
46 Angiospermae, and is globally widespread and second only to the grasses (Poaceae) in  
47 economic importance. Accordingly, it has been intensively studied in botanical,  
48 systematic and agronomic research, but a robust phylogenetic framework and timescale  
49 for legume evolution based on large-scale genomic sequence data is lacking, and key  
50 questions about the origin and early evolution of the family remain unresolved. We  
51 extend previous phylogenetic knowledge to gain insights into the early evolution of the  
52 family, analysing an alignment of 72 protein-coding chloroplast genes and a large set of  
53 nuclear genomic sequence data, sampling thousands of genes. We use a  
54 concatenation approach with heterogeneous models of sequence evolution to minimize  
55 inference artefacts, and evaluate support and conflict among individual nuclear gene

2 PHYLOGENOMIC COMPLEXITY AND POLYPLOIDY IN LEGUMES

56 trees with internode certainty calculations, a multi-species coalescent method, and  
57 phylogenetic supernetwork reconstruction. Using a set of 20 fossil calibrations we  
58 estimate a revised timeline of legume evolution based on a selection of genes that are  
59 both informative and evolving in an approximately clock-like fashion. We find that the  
60 root of the family is particularly difficult to resolve, with strong conflict among gene trees  
61 suggesting incomplete lineage sorting and/or reticulation. Mapping of duplications in  
62 gene family trees suggest that a WGD event occurred along the stem of the family and  
63 is shared by all legumes, with additional nested WGDs subtending subfamilies  
64 Papilionoideae and Detarioideae. We propose that the difficulty of resolving the root of  
65 the family is caused by a combination of ancient polyploidy and an alternation of long  
66 and very short internodes, shaped respectively by extinction and rapid divergence. Our  
67 results show that the crown age of the legumes dates back to the Maastrichtian or  
68 Paleocene and suggests that it is most likely close to the KPB. We conclude that the  
69 origin and early evolution of the legumes followed a complex history, in which multiple  
70 nested polyploidy events coupled with rapid diversification are associated with the mass  
71 extinction event at the KPB, ultimately underpinning the evolutionary success of the  
72 Leguminosae in the Cenozoic.

73

74 **Keywords:** Cretaceous-Paleogene (K-Pg) boundary, Leguminosae, Fabaceae,  
75 Incomplete Lineage Sorting, Whole Genome Duplication events, paleopolyploidy,  
76 phylogenomics

3 KOENEN ET AL.

77

78           The Cretaceous-Paleogene (K-Pg) boundary (KPB), 66 Million years ago (Ma), is  
79 defined by the mass extinction event that famously killed the non-avian dinosaurs and  
80 led to major turnover in the earth's biota. The Chicxulub meteorite impact is generally  
81 thought to have been the cause of the mass extinction, but Deccan trap flood basalt  
82 volcanism likely contributed or may have been the primary cause, in line with previous  
83 global mass extinctions that are all related to volcanism (Keller, 2014). The KPB event  
84 determined in significant part the composition of the Earth's modern biota, because  
85 many lineages that were successful in repopulating the planet and diversifying in the  
86 wake of the KPB have remained abundant and diverse throughout the Cenozoic until  
87 the present. Probably the best-known examples of successful post-KPB lineages are  
88 the mammals and birds, both inconspicuous elements of the Cretaceous fauna, while  
89 their core clades Placentalia and Neoaves became ubiquitous throughout Cenozoic  
90 fossil faunas. Plants were also severely affected by the KPB, with a clear shift in floristic  
91 composition and a drop in macrofossil species richness of up to 78% reported across  
92 boundary-spanning fossil sites in North-America (Wilf & Johnson, 2004; McElwain &  
93 Punyasena, 2007; Vajda & Bercovici, 2014). In addition, a global fungal spike followed  
94 by a global fern spike in the palynological record (Vajda et al., 2001; Barreda et al.,  
95 2012) are consistent with sudden ecosystem collapse and a recovery period  
96 characterized by low diversity vegetation dominated by ferns. Although the KPB is not  
97 considered a major extinction event for plants as no plant family appears to have been

4 PHYLOGENOMIC COMPLEXITY AND POLYPLOIDY IN LEGUMES

98 lost at the KPB (McElwain & Punyasena, 2007; Cascales-Miñana & Cleal, 2014), a  
99 sudden increase in net diversification rate in the Paleocene has been inferred from a  
100 large paleobotanical data set (Silvestro et al., 2015), suggesting increased origination  
101 following the KPB. Arguably, analyses of global plant fossil data suffer from the poor  
102 rock record in the Maastrichtian just prior to the KPB (Nicholls & Johnson, 2008) and  
103 are limited to inferences at family or genus level due to the nature of palaeontological  
104 data, thereby potentially underestimating global extinction rates at the species level.

105 For individual plant lineages, macro-evolutionary dynamics relative to the KPB  
106 extinction event have received less attention than prominent vertebrate clades.  
107 However, given that plants are the main primary producers and structural components  
108 of terrestrial ecosystems, the shaping and diversification of Cenozoic biota cannot be  
109 fully understood without understanding the consequences of the KPB for evolutionary  
110 turnover of plant diversity. The legume family (Leguminosae or Fabaceae), perhaps  
111 more than any other plant clade, appears to parallel Placentalia and Neoaves. No  
112 fossils are known that pre-date the KPB and are clearly identifiable to the legume family  
113 (Herendeen & Dilcher, 1992), but the family was already abundant and diverse in one of  
114 the earliest examples of modern type rainforests in the Paleocene (Wing et al., 2009;  
115 Herrera et al., submitted). The oldest known fossils that are already referable to (stem  
116 groups of) subfamilies are from close to the Paleocene-Eocene Thermal Maximum  
117 (PETM) (morphotype # CJ76 of c. 58 Ma (Wing et al., 2009) can be referred to  
118 Caesalpinioideae and *Barnebyanthus buchananensis* of c. 56 Ma to Papilionoideae

5 KOENEN ET AL.

119 (Crepet & Herendeen, 1992)) and legumes are a ubiquitous element of many Eocene,  
120 Oligocene and Neogene floras (Herendeen & Dilcher, 1992). Today, it is the third most  
121 species-rich angiosperm family, and arguably the most spectacular evolutionary and  
122 ecological radiation of any angiosperm family (McKey, 1994). Leguminosae is  
123 subdivided into six subfamilies (Fig. 1A-F; LPWG, 2017), which share the defining  
124 feature of the family, the fruit (referred to as the “legume” or “pod”) (Fig. 1G). It is the  
125 second most cultivated plant family after the Poaceae, and its species serve many  
126 purposes for humans, including timber, ornamentals, fodder crops and perhaps most  
127 notably, a large set of globally important pulse crops (Fig. 1I). A key trait of many  
128 legumes is the ability to fix atmospheric nitrogen via symbiosis with “rhizobia”-bacteria in  
129 root nodules (Fig. 1H), which leads to enriched soil, high nitrogen content in the leaves,  
130 and protein-rich seeds. The fact that legume species are diverse, omnipresent and often  
131 abundant in nearly all vegetation types across the planet, ranging in habit from large  
132 rainforest trees to small temperate herbs (Fig. 1J-L), means that legumes are an  
133 excellent study system to understand plant evolution in the Cenozoic.

134         The rapid appearance of legume diversity shortly after the first occurrence in the  
135 fossil record has been likened to the 'abominable mystery' of the sudden appearance of  
136 the angiosperms (Sanderson, 2015). The legume phylogeny also suggests rapid early  
137 evolution of legume diversity with very short internodes subtending the six major  
138 lineages following the origin of the family (Lavin et al., 2005; LPWG, 2017) as well as at  
139 the base of subfamilies Detarioideae, Caesalpinioideae (Bruneau et al., 2008; LPWG,

6

## PHYLOGENOMIC COMPLEXITY AND POLYPLOIDY IN LEGUMES

140 2017) and Papilionoideae (Cardoso et al., 2012, 2013; LPWG, 2017). Just as for  
141 Placentalia (Teeling & Hedges, 2013) and Neoaves (Suh et al., 2015; Suh, 2016), this  
142 apparently rapid early diversification of legumes poses problems for phylogeny  
143 inference. In particular, the first few dichotomies in the phylogeny of the family have  
144 been difficult to resolve, as have deep divergences in Detarioideae, Caesalpinioideae  
145 and Papilionoideae (LPWG, 2013 & 2017). In this study, we attempt to resolve the  
146 deep-branching relationships in the legume family by using much larger molecular  
147 sequence data sets than those previously used in legume phylogenetics. Moreover,  
148 previous legume phylogenies have been mainly inferred from chloroplast markers  
149 (Wojciechowski et al., 2004; Lavin et al., 2005; Bruneau et al., 2008; Simon et al., 2009;  
150 Cardoso et al., 2012, 2013; LPWG, 2017). In addition to analysing nearly all protein-  
151 coding genes from the chloroplast genome, here we also analyse thousands of gene  
152 alignments from the nuclear genome.

153 Unlike birds and mammals, whole genome duplication (WGD) events are  
154 common in angiosperms, and such events have been suggested to be significantly  
155 concentrated around the KPB (Fawcett et al., 2009; Vanneste et al., 2014; Lohaus &  
156 Van de Peer, 2016). This is explained by the idea that polyploid lineages could have had  
157 enhanced survival and establishment across the KPB (Lohaus & Van de Peer, 2016) as  
158 well as greater potential to diversify rapidly thereafter relative to diploids (Levin & Soltis,  
159 2018). WGDs have also been found to have occurred multiple times during the early  
160 evolution of the legumes (Cannon et al., 2015) and could have contributed to the initial

7 KOENEN ET AL.

161 rapid diversification of the family, as well to the difficulties of resolving relationships  
162 among the six subfamilies. There is considerable uncertainty about how many WGDs  
163 were involved in the early evolution of legumes and in the placements of possible  
164 WGDs on the legume phylogeny. From whole genome sequencing studies, it has been  
165 known for some time that several papilionoids share a WGD event (Cannon et al., 2006;  
166 Mudge et al., 2005), but recently it has been suggested that several other legume  
167 lineages have also undergone independent WGDs (Cannon et al., 2015). Indeed,  
168 Cannon et al. (2015) showed that the papilionoid WGD is shared by all members of that  
169 subfamily using phylogenetic methods, and used age estimates from  $K_s$  plots to infer  
170 additional independent WGDs early in the evolution of subfamilies Caesalpinioideae,  
171 Cercidoideae and Detarioideae. However, in the absence of data for several critical  
172 legume lineages, the phylogenetic positions of these additional putative WGDs remain  
173 uncertain. A more recent study (Wong et al., 2017) suggested instead that all legumes  
174 share the same WGD, based on rate-corrected  $K_s$  plots and a genetic linkage map of  
175 *Acacia* that suggested mimosoids (Caesalpinioideae) and Papilionoideae retained an  
176 orthologous duplicated chromosomal segment. From homolog gene family trees  
177 generated prior to separating orthologs from paralogs (Yang & Smith, 2014; Smith et al.,  
178 2015; Yang et al., 2015), we map the number of gene duplications over the legume  
179 phylogeny to evaluate how many early legume WGDs occurred and where they are  
180 located on the phylogeny.



8

## PHYLOGENOMIC COMPLEXITY AND POLYPLOIDY IN LEGUMES

181 While the legumes are not known with certainty from any Cretaceous fossil site,  
182 the family has a long stem lineage dating back to c. 80 – 100 Ma (Wang et al., 2009;  
183 Magallón et al., 2015). This long ghost lineage means that the timing of the initial  
184 radiation of the family, as well as of legume WGDs, and notably whether they pre- or  
185 post-date the KPB, are uncertain. In Placentalia and Neoaves, divergence time  
186 estimation has led to much debate, with some studies using molecular sequence data  
187 for divergence time estimation suggesting that both clades originated and diversified  
188 well before the KPB, implying that many lineages of both clades survived the end-  
189 Cretaceous event (Cooper & Penny, 1997; Jetz et al., 2012; Meredith et al., 2011).  
190 However, like the legumes, both groups first appear in the Paleocene fossil record. A  
191 phylogenetic study of mammals combining both molecular sequence data and  
192 morphological characters to enable inclusion of fossil taxa, found only a single placental  
193 ancestor crossing the KPB (O’Leary et al., 2013; but see Springer et al., 2013; dos Reis  
194 et al., 2014). Alternatively, it has been argued that diversification of Placentalia followed  
195 a “soft explosive” model, with a few lineages crossing the KPB followed by rapid ordinal  
196 level radiation during the Paleocene (Phillips, 2015; Phillips & Fruciano, 2018). Recent  
197 time-calibrated phylogenies for birds showed the age of Neoaves to also be close to the  
198 KPB (Jarvis et al., 2014; Claramunt & Cracraft, 2015; Prum et al., 2015), with initial  
199 rapid post-KPB divergence represented by a hard polytomy (Suh, 2016). For legumes, it  
200 is similarly unlikely that modern subfamilies of legumes have Cretaceous crown ages.  
201 These clades, in particular Papilionoideae, Caesalpinioideae and Detarioideae, appear

9 KOENEN ET AL.

202 to have rapidly diversified following their origins, which would imply mass survival of  
203 very large numbers of legume lineages across the KPB. Diversification into the six main  
204 lineages of legumes appears to have occurred rapidly (Lavin et al., 2005), with long  
205 stem branches leading to each of the modern subfamilies. Therefore, two hypotheses  
206 seem plausible: (1) the legumes have a Cretaceous crown age and diversified into the  
207 six subfamilies prior to the KPB, while crown radiations of the subfamilies occurred in  
208 the wake of the mass extinction event, corresponding to a “soft explosive” model, or (2)  
209 a single legume ancestor crossed the KPB and rapidly diversified into six main lineages  
210 in the wake of the mass extinction event, corresponding to a “hard-explosive” model,  
211 with the subsequent subfamily radiations related to the Paleocene-Eocene Thermal  
212 Maximum (PETM) and/or Eocene climatic optimum. Currently available molecular crown  
213 age estimates for the family range from c. 59 to 64 Ma (Lavin et al., 2005; Bruneau et  
214 al., 2008; Simon et al., 2009). These studies, however, lacked extensive sampling of  
215 outgroup taxa and relied instead on fixing the stem age of the legumes, thereby  
216 compromising the ability to estimate the crown age of the family. Furthermore, these  
217 earlier studies relied exclusively on chloroplast sequences, for which evolutionary rates  
218 are known to vary strongly across legumes (Lavin et al., 2005), such that nuclear gene  
219 data are likely to be better suited for estimating divergence times (Christin et al., 2014).

220 In this study, using large genomic-scale data sets, we aim to resolve the deep  
221 divergences in the legume family, find the phylogenetic locations of WGDs and estimate  
222 the timing of these. We analyse these new datasets with Maximum Likelihood (ML)

10 PHYLOGENOMIC COMPLEXITY AND POLYPLOIDY IN LEGUMES

223 analysis, Bayesian inference, a multi-species coalescent summary method and filtered  
224 supernetwork reconstruction to resolve the deep-branching relationships in the family. In  
225 particular, we focus on the relationships among the six major lineages recently  
226 recognized as subfamilies (LPWG, 2017). Sister-group relationships between  
227 subfamilies Papilionoideae and Caesalpinioideae (sensu LPWG, 2017), and of the  
228 clade combining the two with the newly recognized Dialioideae, were previously known  
229 (Lavin et al., 2005; Bruneau et al., 2008; LPWG, 2017). However, the relationships  
230 between the clade comprising those three subfamilies and the other three subfamilies  
231 Cercidoideae, Detarioideae and Duparquetioideae remained difficult to resolve (cf.  
232 Bruneau et al., 2008; LPWG, 2017). Having inferred the most likely species-tree  
233 topology, we evaluate numbers of supporting and conflicting bipartitions for critical  
234 nodes across gene trees. To infer likely locations of WGDs, we count the number of  
235 gene duplications present in nuclear homolog clusters and map these across the  
236 species tree. Finally, we perform molecular clock dating on a selection of informative  
237 and clock-like nuclear genes with 20 fossil calibration points, to infer whether the origin  
238 of the legumes and WGDs in the early evolution of the family are related to the K-Pg  
239 mass extinction event.

240

241 **MATERIAL & METHODS**

242

243 *DNA/RNA Extraction and Sequencing*

11 KOENEN ET AL.

244

245 For the newly generated chloroplast gene data, DNA was extracted from fresh  
246 leaves, leaf tissue preserved in silica-gel or herbarium specimens, using the Qiagen  
247 DNeasy Plant Mini Kit. Sequencing libraries were prepared using the NEBNext Ultra  
248 DNA Library Prep Kit for Illumina. They were then sequenced on the Illumina HiSeq  
249 2000 sequencing platform, at low coverage ('genome-skimming') or as part of hybrid  
250 capture experiments for a separate study on mimosoid legumes (Koenen et al.,  
251 unpublished data). RNA was extracted from fresh leaves using the Qiagen RNeasy  
252 Plant Mini Kit. RNA sequencing libraries were prepared using the Illumina TruSeq RNA  
253 Library Prep Kit and sequenced on the Illumina HiSeq 2000 sequencing platform. All lab  
254 procedures were performed according to the specifications and protocols provided by  
255 the manufacturers of the kits.

256

### 257 *Sequence Assembly*

258

259 Raw reads for the chloroplast DNA data were cleaned and filtered using the  
260 following steps: (1) Illumina adapter sequence artifacts were trimmed using  
261 Trimmomatic v. 0.32 (Bolger et al., 2014), (2) overlapping read pairs were merged with  
262 PEAR v. 0.9.8 (Zhang et al., 2014) and (3) low quality reads were discarded and low  
263 quality bases at the end of the reads were trimmed with Trimmomatic v. 0.32 (using  
264 settings MAXINFO:40:0.1 LEADING:20 TRAILING:20). The quality-filtered reads were

12

## PHYLOGENOMIC COMPLEXITY AND POLYPLOIDY IN LEGUMES

265 then assembled into contigs using the SPAdes assembler v. 3.6.2 (Bankevich et al.,  
266 2012). For RNA data, raw reads were quality-filtered using the FASTX-toolkit v. 0.0.13  
267 ([http://hannonlab.cshl.edu/fastx\\_toolkit/index.html](http://hannonlab.cshl.edu/fastx_toolkit/index.html)) to remove low quality reads (less  
268 than 80% of bases with a quality score of 20 or higher), TagDust v. 1.12 (Lassmann et  
269 al., 2009) to remove adapter sequences and PRINSEQ-lite v. 0.20.4 (Schmieder &  
270 Edwards, 2011) to trim low quality bases off the ends of reads. Transcriptome assembly  
271 was then performed on the quality-filtered reads using Trinity (Grabherr et al., 2011;  
272 Release 2012-06-08), with default settings.

273

### 274 *Chloroplast Proteome Alignment*

275

276 DNA sequences of protein-coding chloroplast genes were newly generated as  
277 described above, or extracted from several different data sources, as specified for each  
278 accession in Table S1. Sequence data were extracted directly from annotated  
279 plastomes in Genbank, by blast searches from *de novo* assembled contigs and from  
280 transcriptomes using custom Python scripts. Sequences for some outgroup taxa (data  
281 from Moore et al., 2010) were downloaded separately per gene from Genbank. For  
282 each gene, a codon alignment was inferred using MACSE v. 1.01b (Ranwez et al.,  
283 2011). Phylogenetic trees were then inferred for each gene separately to screen for  
284 erroneously aligned sequences with RAxML v. 8.2 (Stamatakis, 2014). For some  
285 species, individual gene sequences that led to anomalously long terminal branches

13 KOENEN ET AL.

286 were then removed. The genes *accD* and *clpP* were removed completely. The gene  
287 alignments were concatenated and the full alignment was visually checked and obvious  
288 misalignments were resolved. Furthermore, sequence errors (single A/T indels) that  
289 caused frameshift mutations were corrected and the accuracy of the alignment at codon  
290 level was assessed and corrected if necessary. For a few genes where the ends of  
291 coding sequences had varying lengths, all sites between the first and last stop codon in  
292 the alignment were excluded, since they were poorly aligned. Finally, using BMGE v.  
293 1.12 (Block Mapping and Gathering with Entropy; Criscuolo & Gribaldo, 2010) the  
294 codon alignment was translated to amino acid sequences.

295

#### 296 *Nuclear Gene Data and Matrix Assembly*

297

298 Whole genome and transcriptome data were downloaded from various sources  
299 and augmented with newly generated transcriptome sequence data for six  
300 Caesalpinioideae and Detarioideae taxa (see Table S2). Peptide sequences were  
301 downloaded from annotated genomes, or were extracted from transcriptome assemblies  
302 using TransDecoder (<http://transdecoder.github.io/>). To assemble the nuclear peptide  
303 sequence data into aligned gene matrices, we used the pipeline of Yang & Smith  
304 (2014). We performed mcl clustering as described in Yang & Smith (2014), with a hit  
305 fraction cut-off of 0.75, inflation value of 2 and a minimum log-transformed e-value of  
306 30. These settings lead to clusters with good overlap between sequences and good

14 PHYLOGENOMIC COMPLEXITY AND POLYPLOIDY IN LEGUMES

307 alignability (omitting genes that are too variable), although we may have lost a few short  
308 gene clusters. Next, the homolog gene clusters were subjected to two rounds of  
309 alignment with MAFFT v. 7.187 (Kato & Standley, 2013), gene tree inference inference  
310 with RaxML v. 8.2 (Stamatakis, 2014), and pruning and masking of tips and cutting deep  
311 paralogs as described in Yang & Smith (2014). In the first round we used 0.3 and 1.0 as  
312 relative and absolute cut-offs for trimming tips, respectively, and 0.5 as the minimum  
313 cut-off for cutting deep paralogs, and keeping all clusters with a minimum of 25 taxa for  
314 the second round. In the second round we used more stringent cut-off values (0.2 and  
315 0.5 for trimming tips and 0.4 for cutting deep paralogs). See Yang & Smith (2014) for  
316 more information on these parameter settings. One-to-one orthologs and rooted ingroup  
317 (RT) homologs were then extracted from the homolog cluster trees, with a minimum  
318 aligned length of 100 amino acids for each homolog. One-to-one orthologs are those  
319 homolog gene clusters in which each taxon is represented only by a single gene copy.  
320 RT homologs are extracted by orienting homolog cluster trees by rooting them on the  
321 outgroup (in our case *Aquilegia coerulea* and *Papaver somniferum*), and then detecting  
322 gene duplications and pruning the paralog copies with fewer taxa present until each  
323 taxon is represented by a single copy. The outgroup is pruned as well, and clusters  
324 without outgroup in which each taxon is only present once are also included, meaning  
325 that all 1-to-1 orthologs are also in the RT homolog set. See Yang & Smith (2014) for a  
326 more detailed description of how these homologs are extracted. Sequences with more  
327 than 50% gaps and all sites with more than 5% missing data were removed from the

15 KOENEN ET AL.

328 homolog alignments using BMGE. For the 1-to-1 orthologs that were used for species  
329 tree inference, alignments with fewer than 50 taxa were discarded, for the larger set of  
330 RT homologs that were used for counting of supporting and conflicting bipartitions,  
331 alignments with fewer than 25 taxa were discarded.

332

333 *Phylogenetic Inferences*

334

335 Maximum likelihood (ML) and Bayesian analyses were run in RaxML v. 8.2  
336 (Stamatakis, 2014) and Phylobayes-MPI 1.7 (Lartillot et al., 2013), respectively. For the  
337 ML analysis using nucleotide sequences of the chloroplast alignment, we used  
338 PartitionFinder 2 (Lanfear et al., 2017) to estimate partitions, with a minimum length per  
339 partition set to 500 nucleotides, and allowing different codon positions per gene to be in  
340 different partitions. The resulting 16 partitions were run with the GTR + GAMMA model,  
341 and 1000 rapid bootstrap replicates were carried out. For the amino acid sequences,  
342 the ML analyses of both the chloroplast alignment and the concatenated alignment of  
343 nuclear 1-to-1 orthologs were analyzed with the LG4X model, without partitioning, as  
344 the model accounts for substitution rate heterogeneity across the alignment by  
345 estimating 4 different LG substitution matrices (Le et al., 2012). For the chloroplast  
346 alignment, 1000 rapid bootstrap replicates were additionally carried out. Gene trees of  
347 1-to-1 orthologs and RT homologs were estimated with RAXML using the WAG + G  
348 model, with 100 rapid bootstrap replicates. We then calculated 80% majority-rule



16

## PHYLOGENOMIC COMPLEXITY AND POLYPLOIDY IN LEGUMES

349 consensus trees for each ortholog or homolog and used these to calculate Internode  
350 Certainty All (ICA) values using RAxML, to include only nodes that received 80% or  
351 greater bootstrap support in the individual gene trees. Bayesian analyses were  
352 performed with the CATGTR model, with invariant sites deleted and default settings for  
353 other options in Phylobayes. Analyses were run until the chain reached convergence  
354 (usually after 10-20k cycles), with at least two independent chains run for each data set.  
355 To perform Bayesian analyses on the complete nuclear gene data set in a  
356 computationally tractable manner, we ran 25 gene jack-knifing replicates without  
357 replacement, dividing the total number of genes over 5 subsets with 5 replicates. These  
358 subsampled replicates were run in Phylobayes-MPI, with a starting tree derived from the  
359 analysis sampling the 100 genes with the longest gene tree length, using the CATGTR  
360 model with constant sites deleted, for 1000 cycles each. We found that all 25 chains  
361 had converged after a few hundred cycles, and discarded the first 500 cycles of each as  
362 burn-in. A majority-rule consensus tree was constructed using sumtrees.py (from the  
363 Dendropy library (Sukumaran et al., 2010)) from 12500 total posterior trees,  
364 representing the MCMC cycles 501-1000 of each replicate. For both the ML and  
365 Bayesian analyses, concatenated alignments were not partitioned. Instead we rely on  
366 the LG4X and CATGTR models to take rate heterogeneity into account, since these  
367 models describe heterogeneity across alignments more accurately than partitioning by  
368 gene and/or codon since the substitution process also varies across gene sequences  
369 and codon positions. For the multi-species coalescent analysis, we used ASTRAL

17 KOENEN ET AL.

370 (Mirabab et al., 2014) on the 1,103 gene trees estimated with RAxML, using local  
371 posterior probability and quartet support to evaluate the inferred topology (Sayyari &  
372 Mirabab, 2016).

373

374 *D<sub>n</sub>/D<sub>s</sub> Ratio Analyses for cpDNA*

375

376         The codon alignments for each chloroplast gene were analyzed individually using  
377 the branch model test in PAML v. 4.9 (Yang, 2007), to test if higher substitution rates in  
378 the 50-kb inversion and vicioid clades of Papilionoideae were related to differing  
379 selective pressures. These clades were partitioned separately to allow for the estimation  
380 of independent rates of synonymous and non-synonymous substitution rates for each of  
381 these clades relative to the rest of the tree. Since the vicioid clade is nested in the 50-kb  
382 inversion clade, the rates reported for the latter clade are estimated without the vicioid  
383 clade taxa. While this test does not evaluate selective pressures for specific sites, it  
384 does give an indication whether genes evolve neutrally or are under purifying or positive  
385 selection.

386

387 *Counting Supporting Bipartitions for Key Nodes across Gene Trees*

388

389         Using a custom python script, numbers of matching and alternative bipartitions  
390 across gene trees were counted for particular nodes labeled A-H in Figure 3A in the

18

## PHYLOGENOMIC COMPLEXITY AND POLYPLOIDY IN LEGUMES

391 legume phylogeny. For this purpose, we assessed monophyly of each of the subfamilies  
392 and combinations (clades) of subfamilies, against the outgroup, across all gene trees.  
393 For each gene tree, we first assessed whether all 6 groups (5 subfamilies plus the  
394 outgroup) are present and gene trees with missing groups were not taken into account.  
395 Next, we evaluated whether the gene tree includes a matching bipartition for the family,  
396 each subfamily and for all possible combinations of subfamilies. A matching bipartition  
397 means that all taxa of a subfamily or combination of subfamilies are separated from all  
398 other taxa in the gene tree, thus constituting support for that clade to be monophyletic.  
399 For combinations of subfamilies, the subfamilies themselves do not necessarily need to  
400 be monophyletic, but all taxa within those subfamilies should be separated from all other  
401 taxa to constitute a matching bipartition, and thus to be a supported clade in the gene  
402 tree. For well supported clades, we expect matching bipartitions for a majority of gene  
403 trees. For poorly supported clades, we expect most gene trees to be uninformative due  
404 to low phylogenetic signal, hence a low number of matching bipartitions, and possibly  
405 relatively high numbers of conflicting bipartitions. All counts were done for ML gene  
406 trees of RT homologs, and with 50 and 80% bootstrap cutoffs. The recently published  
407 DiscoVista software package (Sayyari et al., 2018) allows similar evaluations of  
408 conflicting and supporting bipartitions to those described here to be made and  
409 visualized.

410

411 *Phylogenetic Supernetwork Analysis*

19 KOENEN ET AL.

412

413 We used SplitsTree4 to draw a filtered supernetwork (Whitfield et al., 2008) of the  
414 1,103 1-to-1 orthologs, using the 80% majority-rule consensus trees to only include  
415 well-supported bipartitions to infer the network. All gene trees were pruned for simplified  
416 visualization, focusing on the deep divergences within the legume family. All taxa  
417 outside the nitrogen-fixing clade comprising Cucurbitales, Fabales, Fagales, Rosales,  
418 as well as a subset of taxa in the relatively densely sampled Papilionoideae and  
419 Caesalpinioideae were pruned, preferentially keeping taxa that were sampled in as  
420 many gene trees as possible. The mintrees parameter was set to 552 (at least 50% of  
421 the number of orthologs) and the maximum distortion parameter was set to 0.

422

#### 423 *Gene Duplication Mapping*

424

425 We used the homolog clusters generated from the Yang & Smith (2014) pipeline  
426 prior to extracting 1-to-1 and RT orthologs to map duplications onto the species tree.  
427 First, all sites with more than 5% missing data were removed with BMGE, to reduce the  
428 amount of missing data. Also all sequences with more than 75% gaps were removed, to  
429 avoid having fragmented paralog sequences present, which could inflate the number of  
430 gene duplications. These data removal steps also led to the elimination of some clusters  
431 with large amounts of missing data. Tree estimation was then repeated on these  
432 clusters, with RAxML using the WAG + G model and 100 rapid bootstrap replicates.

20

## PHYLOGENOMIC COMPLEXITY AND POLYPLOIDY IN LEGUMES

433 Next, rooted ingroup clades were extracted from the resulting homolog trees with the  
434 `extract_clades.py` script that is included with the Yang & Smith (2014) pipeline. To  
435 extract the clades, we only considered *Aquilegia* and *Papaver* as outgroup taxa,  
436 because the outgroup is not included in the extracted clades, and this way we could  
437 maximize the number of taxa per extracted clade. However, because of uncertain  
438 relationships along the backbone of Pentapetalae, we observed that the clusters were  
439 often not correctly rooted. This does not have much effect for the number of duplications  
440 that are observed near the tips, but it does lead to erroneous mapping near the base of  
441 the tree. Therefore, we rooted the extracted clades with the Phyx package (Brown et al.,  
442 2017), using a list of the non-legume taxa ordered by their phylogenetic relationships,  
443 rooting the trees on the taxon that is most distantly related to legumes. Clusters that  
444 included only legume species, without any outgroup taxa present, were excluded. From  
445 the resulting multi-labeled trees (i.e. each taxon can be present multiple times,  
446 representing different paralogs), duplications were mapped onto the species tree, with  
447 and without a 50% bootstrap cut-off, using `phyparts` (Smith et al., 2015).

448

### 449 *Divergence time analyses*

450

451 Fossils used to calibrate molecular clock analyses are listed in Table 1 and are  
452 discussed in Methods S1.

21 KOENEN ET AL.

453           Using SortaDate (Smith et al., 2018b), we analyzed all gene trees to estimate the  
454 total tree length (a proxy for sequence variation or informativeness), root-to-tip variance  
455 (a proxy for clock-likeness) and compatibility of bipartitions with the ML tree that was  
456 inferred using the full data set (the RAxML tree inferred with the LG4X model, shown in  
457 Figure 3A). We then selected the best genes for dating based on cutoff values that were  
458 arbitrarily chosen from the estimated values across gene trees: (1) total tree length  
459 greater than 5, (2) root-to-tip variance less than 0.005 and (3) at least 10% of the  
460 bipartitions in common with the ML tree. This yielded 36 genes, which were  
461 concatenated to have a total aligned length of 14462 amino acid sites. We also used the  
462 ‘pxlstr’ program of the Phyx package (Brown et al., 2017) to calculate taxon-specific  
463 root-to-tip lengths from the ML tree, after pruning the Ranunculales, on which the tree  
464 was rooted. The values obtained were then used to define local clocks as described  
465 below. *Arabidopsis thaliana*, *Linum usitatissimum* and *Polygala lutea* were removed  
466 because of much higher root-to-tip lengths relative to their closest relatives. *Panax*  
467 *ginseng* was also removed because of a low root-to-tip length relative to the other  
468 sampled asterids, leaving a total of 72 taxa.

469           We used BEAST v.1.8.4 (Drummond et al., 2012) with various clock models to  
470 estimate divergence time estimates across the phylogeny based on the alignment of the  
471 selected 36 genes and the fossil calibrations described above. All analyses were run  
472 with the LG + G model of amino acid substitution and the birth-death tree prior, and  
473 using the ML tree to fix the topology. Fossil calibration priors were set as uniform priors

22

## PHYLOGENOMIC COMPLEXITY AND POLYPLOIDY IN LEGUMES

474 between the minimum age as specified in Table 1 and a maximum age of 126 Ma  
475 (oldest fossil evidence of eudicots) as listed in Table S4, with the exception of the root  
476 node, for which we used a normal prior at 126 Ma with a standard deviation of 1.0 and  
477 truncated to minimum and maximum ages of 113 (the Aptian-Albian boundary) and 136  
478 Ma (the oldest crown angiosperm fossil, see Magallón et al. (2015)). With these  
479 settings, we ran analyses under the uncorrelated lognormal (UCLN), strict (STRC),  
480 random (RLC) and 3 different fixed local (FLC) clock models. To specify the different  
481 FLC models, we looked at root-to-tip length variation across subclades to specify  
482 biologically meaningful *a priori* clock partitions (Fig. S19). The 50kb-inversion clade of  
483 papilionoid legumes and the asterids (without *Panax ginseng*) have uniformly longer  
484 root-to-tip lengths than the other taxa across the tree and were therefore assigned their  
485 own local clock, with a different clock for the remaining taxa in the tree (this model  
486 referred to as FLC3, partitioning of taxa is illustrated in Supplementary Figure S19A). A  
487 more complex model was specified where the rosoid rate was decoupled from the  
488 background rate and more clock partitions within the legumes were created for the  
489 mimosoids together with the *Cassia* clade because of their longer root-to-tip lengths  
490 relative to other Caesalpinioideae and most of the rosoid clade and for the combined  
491 clade of Cercidoideae and Detarioideae as well. This more complex model is referred to  
492 as FLC6 (Fig. S19B). The most complex model (FLC8; Fig. S19C) was generated by  
493 further partitioning the combined clade of Cercidoideae and Detarioideae with a  
494 separate local clock for each subfamily, and one on their combined stem lineages (this

23 KOENEN ET AL.

495 most complex partitioning is also indicated with colored branches in Figures 6 and S16-  
496 17 and those of the other FLC models in Figures S14-15). The Ranunculales that were  
497 pruned for the root-to-tip length calculations were included in the background clock for  
498 each FLC model.

499         The separate clock partitions assigned to Cercidoideae and Detarioideae in the  
500 FLC8 model are particularly useful for evaluating the controversial placement of Early  
501 and Middle Eocene fossils within their crown groups (see Methods S1). This was done  
502 by running two analyses under the FLC8 model, one with the same priors as the other  
503 analyses, and one where calibrations C and G were changed and another calibration  
504 ( $H^9$ ) was added to use similar placements of these calibrations as in Bruneau et al.  
505 (2008) and Simon et al. (2009) (Table 1 & Methods S1). We refer to this calibration  
506 scheme as “alternative prior 1” (Table S4). Since a separate local clock is assigned to  
507 the combined stem lineages of Cercidoideae and Detarioideae, substitution rate  
508 estimates for stem and crown groups can be compared under both calibration schemes.

509         Maximum ages of fossil calibrations were set conservatively, and perhaps overly  
510 so, which can lead to a poorly formed joint marginal prior on node ages across the tree  
511 (Phillips, 2015). Therefore, we also constructed an alternative prior with less  
512 conservative maxima as specified in Table S4 (“alternative prior 2”). These maxima  
513 represent boundary ages of older epochs from which the crown or stem group is not  
514 known, and in line with ages found by Magallón et al. (2015). These analyses serve to  
515 test the sensitivity of the UCLN model to the marginal prior.



24 PHYLOGENOMIC COMPLEXITY AND POLYPLOIDY IN LEGUMES

516 Analyses sampling from the prior (without data) were run for 100 million  
517 generations, the strict clock and FLC3 and FLC6 analyses were run for 25 million  
518 generations and all other clock analyses were run for 50 million generations, and  
519 convergence was confirmed with Tracer v1.7.1 (Rambaut et al., 2018). For the non-prior  
520 analyses, the first 10% of the total number of generations was discarded as burn-in  
521 before summarizing median branch lengths and substitution rates with TreeAnnotator  
522 from the BEAST package.

523

524 **RESULTS**

525

526 The chloroplast alignment includes 72 protein-coding genes, for 157 taxa  
527 (including 111 legume species; Table S1), with a total aligned length of 75,282 bp or  
528 25,094 amino acid residues. From transcriptomes and fully sequenced genomes, we  
529 gathered 9,282 homologous nuclear encoded gene clusters for 76 taxa including 42  
530 legume species (Table S2). From these clusters, we extracted protein alignments of  
531 1,103 1-to-1 orthologs for species tree inference with a total aligned length of 325,134  
532 amino acids when concatenated, and 7,621 Rooted Ingroup (RT) homologs for  
533 additional gene tree inference. We also extracted 8,038 rooted clades from the homolog  
534 clusters to map the locations of gene duplications. The alignments, gene trees and  
535 species trees are available in TreeBASE (accession number XXXX) and on Dryad (doi:  
536 XXXX).

25 KOENEN ET AL.

537

538 *Inferring the Species Tree*

539

540 Our analyses reveal that both the chloroplast and nuclear data sets resolve all  
541 subfamilies as monophyletic with full support and most relationships among the  
542 subfamilies are also robustly resolved (Figs 2, 3A-C & S1-7), with the notable exception  
543 of the root node. The clade consisting of Papilionoideae, Caesalpinioideae and  
544 Dialioideae is recovered in all analyses, with *Duparquetia* as the sister-group to this  
545 clade as inferred from chloroplast data. *Duparquetia* is not sampled for nuclear data,  
546 therefore transcriptome or genome sequencing is necessary for this taxon to confirm the  
547 relationship found here. The root node of the legume family is more difficult to resolve,  
548 and the chloroplast and nuclear data sets lead to conflicting topologies. The chloroplast  
549 alignment supports Cercidoideae as sister to the rest of the family when analysing  
550 protein sequences with ML under the LG4X model (58% bootstrap support; Fig. S1) and  
551 Bayesian inference under the CATGTR model (0.98 posterior probability (pp); Figs 2 &  
552 S2). When analysing chloroplast nucleotide sequences, we recovered the same  
553 relationship in a partitioned ML analysis under the GTR model (recovered in 66% of the  
554 bootstrap replicates; Fig. S3), but a Bayesian analysis under the CATGTR model does  
555 not resolve the root, the majority-rule consensus tree showing a polytomy of  
556 Cercidoideae, Detarioideae and a robustly supported clade formed by the other four  
557 subfamilies (Fig. S4). To resolve deep divergences, amino acid sequences are more

26

## PHYLOGENOMIC COMPLEXITY AND POLYPLOIDY IN LEGUMES

558 suitable because they are less saturated with substitutions (silent substitutions are  
559 absent), and less prone to long branch attraction (LBA). Additionally, the LG4X and CAT  
560 models better account for heterogeneous substitution rates across sites in the alignment  
561 (Lartillot & Philippe, 2004; Le et al., 2012). Taken together, this suggests that the sister-  
562 group relationship of Cercidoideae with the rest of the family is the most likely rooting as  
563 inferred from chloroplast data, but given the low bootstrap support values, phylogenetic  
564 signal with regards to the root node appears to be limited. A notable observation is that  
565 the chloroplast genome evolves markedly faster in the 50kb-inversion clade of  
566 Papilionoideae than in other legumes (with even higher rates apparent in the vicioid  
567 clade), as is evident from both the nucleotide and amino acid alignments (Figs 2C & S1-  
568 4), suggesting that this pattern is not driven solely by synonymous substitutions.  
569 However, branch model  $D_n/D_s$  ratio tests do not find any evidence of differential  
570 selection acting on chloroplast genes across the different clades (Fig. 2D), and suggest  
571 that the majority of chloroplast genes across legumes are under purifying selection.

572 In contrast to the results obtained with chloroplast data, in all analyses of the  
573 1,103 nuclear 1-to-1 orthologs, we recover a sister-group relationship between  
574 Cercidoideae and Detarioideae, with this clade sister to the clade comprising of  
575 Dialioideae, Caesalpinioideae and Papilionoideae (note that Duparquetioideae is not  
576 sampled) (Figs 3A-C & S5-7). We inferred an ML tree of the concatenated alignment  
577 with the LG4X model, and calculated Internode Certainty All (ICA) values from  
578 bootstrapped gene trees on this topology (Fig. 3A & S5). Only bipartitions that received

27 KOENEN ET AL.

579 >80% bootstrap support were considered. The internode certainty metric was  
580 introduced to assess phylogenetic conflict among loci and identify internodes with high  
581 certainty, to be used in particular in phylogenomic studies where bootstrap values are  
582 often inflated (Salichos & Rokas, 2013). The sister-group relationship between  
583 Cercidoideae and Detarioideae is well-supported, receiving an ICA value of 0.85. A  
584 Bayesian jackknifing analysis with the CATGTR model infers a nearly identical topology  
585 to the ML topology (Fig. 3B & S6), with posterior probability of 0.91 in support of this  
586 same relationship. The multi-species coalescent species-tree inferred with ASTRAL  
587 (Mirabab et al., 2014), which accounts for incomplete lineage sorting (ILS), is also  
588 consistent with that relationship (Fig. 3C & S7), with the Cercidoideae/Detarioideae  
589 clade supported by a local posterior probability of 0.95 (Sayyari & Mirabab, 2016). In  
590 summary, all analyses of nuclear protein alignments lend strong support for a sister-  
591 group relationship between Cercidoideae and Detarioideae.

592

### 593 *Evaluation of Gene Tree Support and Conflict*

594

595 While the chloroplast and nuclear phylogenies show a different topology with  
596 regards to the first two dichotomies within the legumes, the different types of analyses  
597 performed on the nuclear data set all yield the same topology at the base of the family  
598 (Figs 3A-C). Because the nuclear data set consists of 1,103 unlinked loci sampled from  
599 across the nuclear genome compared to the single locus that the chloroplast genome

28

## PHYLOGENOMIC COMPLEXITY AND POLYPLOIDY IN LEGUMES

600 constitutes, this topology should be considered to be more likely. However, when  
601 evaluating gene tree conflict, it appears that a large number of conflicting bipartitions  
602 exist, with the most prevalent being nearly as frequent across gene trees as compatible  
603 bipartitions (pie charts in Figure 3A). The quartet support as calculated by ASTRAL is  
604 also low (37%, with alternative quartet supports 33% and 30%; pie charts in Figure 3C).  
605 The relationships among the remaining three sampled subfamilies are also supported  
606 by significantly fewer bipartitions and lower quartet support than for example the legume  
607 crown node (pie charts in Figures 3A & C). Furthermore, the filtered supernetwork  
608 shows a complex tangle of gene tree relationships at the base of the legumes (Fig. 4).

609         Rather than relying solely on ICA and quartet support values, we sought to  
610 evaluate in a more intuitive way how much support and conflict there is among gene  
611 trees for the deepest divergences in the legume family. For nodes labeled A-H in Figure  
612 3A, we counted how often a bipartition that is equivalent to that node in the species tree  
613 is encountered across gene trees, and how often those bipartitions received at least 50  
614 or 80% bootstrap support. We did this on all RT homologs (n=7,621) in which all  
615 subfamilies and the outgroup were represented by at least one taxon each, leading to  
616 3,473 gene trees being considered. This shows that the legume family as a whole, and  
617 the four subfamilies for which more than one taxon was sampled (nodes C, D, G and  
618 H), are all found to be monophyletic across the majority of gene trees (Fig. 5A & Table  
619 2), and those bipartitions mostly receive at least 50 or 80% bootstrap support. Nodes B,  
620 E and F, that is, the relationships among the subfamilies, are recovered in many fewer

29 KOENEN ET AL.

621 gene trees, especially when only considering bipartitions with at least 50 or 80%  
622 bootstrap support. For these nodes, we then checked how often the most important  
623 conflicting bipartitions were present (Figs 5B-D & Table 2). These conflicting bipartitions  
624 are each less prevalent than those found by the concatenated ML and Bayesian  
625 analyses as well as by ASTRAL, confirming that the recovered topology represents the  
626 relationships among legume subfamilies that is supported by the largest fraction of the  
627 genomic data used here. But it also shows that there is significant and well-supported  
628 gene tree conflict, in line with the complicated tangle and short edges observed in the  
629 filtered supernetwork at the base of the legumes (Fig. 4).

630

631 *Inferring Phylogenetic Locations of WGDs*

632

633 To map gene duplications over the species tree, we first removed fragmentary  
634 sequences and gappy sites from the 9,282 homolog clusters, after which 640 clusters  
635 with large amounts of missing data were eliminated. From trees that were inferred from  
636 the remaining 8,642 homologs, we extracted 8,038 rooted clades. Exemplar homolog  
637 trees with gene duplications are shown in Figure S8. We find significantly elevated  
638 numbers of gene duplications at several nodes where WGDs are hypothesized to have  
639 occurred, including the previously documented *Salix/Populus* clade (Tuskan et al.,  
640 2006) and one subtending Pentapetalae, consistent with the known *gamma*  
641 hexaploidization associated with that clade (Jiao et al., 2012) (Figs 3D & S9). For the

30

## PHYLOGENOMIC COMPLEXITY AND POLYPLOIDY IN LEGUMES

642 Pentapetalae clade, many homologs show more than one gene duplication at that node,  
643 given that the number of duplications (1,901) is nearly twice as high than the number of  
644 homologs with duplications (1,105), as expected for two consecutive rounds of WGD.  
645 Part of these duplications may also stem from older events, since missing data for the  
646 three non-Pentapetalae taxa in our dataset could mean that we do not find duplicates of  
647 older events in these taxa. In the legumes, high numbers of gene duplications at  
648 particular nodes suggest that there were three early WGD events, one at the base of  
649 the family, and one each subtending subfamilies Papilionoideae and Detarioideae (Figs  
650 3D & S9). When applying a bootstrap filter to the homolog trees ( $\geq 50\%$  bootstrap  
651 support), numbers of gene duplications are considerably lower, but the pattern is the  
652 same (Figs 3D & S9). At the root of the family, the number of gene duplications drops  
653 from 1,646 to 99 when applying this bootstrap filter, in line with the difficulty of resolving  
654 the deepest dichotomies of the legume phylogeny. Notably, for the legume crown node  
655 we also find evidence for a significant part of homologs having had more than one gene  
656 duplication, because 1,646 duplications from only 1,229 homologs map on that node.  
657 This would suggest multiple rounds of WGD (e.g. Figs S8E & F), although some of  
658 these can be attributed to duplications in both paralog copies of genes duplicated at the  
659 *gamma* event, while for many others support values across the tree are low. For other  
660 hypothesized WGDs, the numbers of homologs with more than one duplication for those  
661 nodes are much lower, suggesting they involved a single round of WGD.

662

31 KOENEN ET AL.

663 *Divergence Time Estimation*

664

665 To establish whether the origin of legumes and the early WGD events are closely  
666 associated with the KPB, we performed clock dating in a Bayesian framework. Because  
667 the chloroplast phylogeny shows large root-to-tip length variation (Fig. 2), we refrained  
668 from using the chloroplast data to infer divergence time estimates, and instead rely on  
669 the better suited nuclear data for this purpose as suggested by Christin et al. (2014).  
670 We selected 36 relatively highly informative and clock-like nuclear genes and 20 fossil  
671 calibrations (Table 1 and Methods S1). The oldest definitive fossil evidence of crown  
672 group legumes is from the Late Paleocene, consisting of bipinnate leaves from c. 58 Ma  
673 (Wing et al., 2009; Herrera et al., submitted) and papilionoid-like flowers from c. 56 Ma  
674 (Crepet & Herendeen, 1992), representing Caesalpinioideae and Papilionoideae  
675 respectively. The older fossil woods with vestured pits, from the Early Paleocene of  
676 Patagonia (Brea et al., 2008) and the Middle Paleocene of Mali (Crawley, 1988), could  
677 represent stem relatives of the family (vestured pits are found in Papilionoideae,  
678 Caesalpinioideae and Detarioideae, so this is likely an ancestral legume trait). Based on  
679 this fossil evidence, c. 58 Ma can be considered the minimum age of the legume crown  
680 node. Molecular age estimates (95% HPD intervals) for the crown node range from  
681 65.47-86.45 Ma and 73.46-81.18 Ma under the uncorrelated log-normal relaxed clock  
682 (UCLN) and the random local clock (RLC) models, respectively, to minima and maxima  
683 between 64.63 and 68.85 Ma under various fixed local clock (FLC) models (Table S3),



32

## PHYLOGENOMIC COMPLEXITY AND POLYPLOIDY IN LEGUMES

684 the latter suggesting a close association of the origin of the legumes with the KPB (Fig.  
685 6). Maximum clade credibility (MCC) trees for all clock analyses, with 95% HPD  
686 intervals indicated, are included in Supplementary Figures S10-17, and 95% HPD  
687 intervals for nodes A-H are listed in Table S3.

688 Placement of Eocene fossils of Detarioideae and Cercidoideae within the crown  
689 groups of those clades (Bruneau et al., 2008; Simon et al., 2009; de la Estrella et al.,  
690 2017), yields older crown group estimates for these clades. However, with these  
691 calibrations (alternative prior 1 in Table S4), a more than 10-fold higher substitution rate  
692 along the stem lineages of these two subfamilies relative to the rates within both crown  
693 clades is inferred (c.  $8.82 \times 10^{-3}$  vs  $0.69 \times 10^{-3}$  substitutions per site per million years,  
694 with identical rates estimated independently for Cercidoideae and Detarioideae; Fig.  
695 S18A). This rate is also nearly five times higher than the mean rate across the tree as a  
696 whole ( $1.54 \times 10^{-3}$  substitutions per site per million years), while the crown clades are  
697 estimated to have rates about half as high as the mean. Analyses with the same clock  
698 partitioning but calibrated with Late Eocene *Cercis* fossils and Mexican amber  
699 (*Hymenaea*) as the oldest crown group evidence for Cercidoideae and Detarioideae,  
700 respectively, do not infer such strong substitution rate shifts, with all clock partitions  
701 across the phylogeny estimated to have a substitution rate ranging from  $0.96 \times 10^{-3}$  to  
702  $2.53 \times 10^{-3}$  substitutions per site per million years (Fig. S18B). Either way, different  
703 placements of these fossils have little influence on the crown age estimates for the  
704 family in the FLC analyses (Figs S15 & S16, Table 3).

33 KOENEN ET AL.

705

706 **DISCUSSION**

707

708         In this study, we present significant advances in our understanding of the origin  
709 and early evolution of the legume family. All the different species tree analyses of the  
710 nuclear genomic data yielded the same most likely topology with regards to  
711 relationships among subfamilies and the root of the legumes. Detailed evaluation of  
712 supporting and conflicting bipartitions across gene trees show that these relationships  
713 are the most prevalent, but we also found many conflicting bipartitions, and the  
714 chloroplast phylogeny also shows a different rooting of the family. Furthermore, we find  
715 evidence for three WGD events early in the evolution of the family, which further  
716 complicate the phylogenomic tangle at the base of the family. Time-calibration of the  
717 species tree suggests a close association of this complex origin of the legumes with the  
718 KPB. We discuss these findings and their relevance to understanding the evolution of  
719 the third largest angiosperm family, the likely complications caused by WGDs on  
720 phylogenetic inferences in deep time and the consequences of the KPB mass extinction  
721 event on plant evolution in the Cenozoic.

722

723 *Substitution Rate Variation in Legume Chloroplast Genomes*

724

34

## PHYLOGENOMIC COMPLEXITY AND POLYPLOIDY IN LEGUMES

725           The chloroplast data set has the advantage of denser taxon sampling (including  
726 subfamily Duparquetioideae) compared to the nuclear genomic data. However, the  
727 chloroplast data are less useful for phylogenomic analysis, being effectively a single  
728 locus in the absence of recombination in plastid genomes. Furthermore, chloroplast  
729 genes have highly heterogeneous substitution rates across legumes, leading to a well-  
730 resolved topology in core Papilionoideae but poor resolution in other lineages,  
731 particularly Caesalpinioideae (Figs 2C & S1-4). It has long been known that there is  
732 significant variation in rates of chloroplast sequence evolution among plant lineages  
733 (Bousquet et al., 1992) and previous analyses of single chloroplast genes (Lavin et al.,  
734 2005) and legume chloroplast genomes (Dugas et al., 2015; Schwarz et al., 2017;  
735 Wang et al., 2018) have suggested substantial variation in rates of molecular evolution  
736 among legume lineages. Because branch model  $D_n/D_s$  ratio tests do not provide  
737 evidence for different selective forces on photosynthesis genes across legumes, this  
738 pattern may rather be related to life-history strategies in the 50Kb-inversion clade, which  
739 includes many herbaceous plants of short stature (Lanfear et al., 2013) and shorter  
740 generation times (Smith & Donoghue, 2008), especially in the vicioid clade where the  
741 highest rates are found (Fig. 2C).

742

743 *Resolving the Deep-branching Relationships in the Leguminosae*

744

35 KOENEN ET AL.

745           The difficulty of obtaining resolution for the deep divergences in the legume  
746 family is in part caused by lack of phylogenetic signal in a large fraction of the sampled  
747 genes (pie charts in Figure 3A), with too few substitutions having accumulated along the  
748 deepest short internodes due to rapid early divergence of the six principal legume  
749 lineages. Lack of phylogenetic signal could potentially be explained by rapid  
750 diversification which, especially in combination with extinction of stem-relatives, causes  
751 alternations of long and short internodes, leading to “bushy” phylogenies that are  
752 extremely difficult to resolve (Rokas & Carrol, 2006). However, for a significant  
753 proportion of those genes that do have sufficient phylogenetic signal, we find strongly  
754 supported conflicting evolutionary histories. Putting aside methodological issues such  
755 as poor orthology inference for a number of genes, this conflict is likely to be caused by  
756 incomplete lineage sorting (ILS) (Pamilo & Nei, 1988; Maddison, 1997). Together with  
757 the complexity depicted in the supernetwork (Fig. 4), the strongly supported conflicting  
758 gene trees suggest that a fully bifurcating tree is an oversimplified representation of the  
759 initial radiation of the legumes. As we show here, genes have many different  
760 evolutionary histories across the early divergences of legumes (Table 2), while the  
761 species tree merely represents the dominant evolutionary history. In the case of  
762 complete lack of phylogenetic signal, or equally prevalent conflicting evolutionary  
763 histories without a single dominant one, this would constitute a hard polytomy, meaning  
764 (nearly) instantaneous speciation of three or more lineages, as demonstrated for  
765 Neoaves (Suh, 2016). Alternatively, a phylogenetic network can provide a better

36

## PHYLOGENOMIC COMPLEXITY AND POLYPLOIDY IN LEGUMES

766 representation of evolutionary relationships when there is significant gene tree conflict.  
767 In the legumes, there does appear to be one dominant evolutionary history in the  
768 relationships among subfamilies, suggesting that the root of the family is strictly  
769 speaking not a hard polytomy. Nevertheless, the short internodes leading to lack of  
770 phylogenetic signal and significant conflict among gene trees at the base of the legumes  
771 suggest that the first few divergences in the family occurred within a short time span,  
772 leading to ILS. Indeed, strong gene tree conflict caused by ILS has been shown to be  
773 relatively common when internodes are short due to rapid speciation and this provides  
774 an explanation as to why many relationships are contentious (e.g. Pollard et al., 2006;  
775 Suh et al., 2015; Moore et al., 2017). In such cases, it is essential that phylogenomic  
776 studies explicitly evaluate conflicting phylogenetic signals across the genome. By taking  
777 into account alternative topologies that are supported by significant numbers of gene  
778 trees (Fig. 5) and inferring a phylogenetic network (Fig. 4), the phylogenomic complexity  
779 of the initial radiation of the legumes is revealed.

780

### 781 *Locating WGD Events on the Phylogeny*

782

783 Numbers of gene duplications mapped onto the species tree provide evidence for  
784 three WGD events early in the evolution of the legume family, one shared by the whole  
785 family, plus independent nested WGDs subtending subfamilies Detarioideae and  
786 Papilionoideae. We note that several nodes that immediately follow the most likely

37 KOENEN ET AL.

787 locations of hypothesized WGD events also show elevated numbers of gene  
788 duplications (Figs 3D & S9). This is most likely caused by missing data for some taxa.  
789 For example, sequences for *Xanthocercis zambesiaca*, *Cladrastis lutea* and  
790 *Styphnolobium japonicum* are derived from transcriptomes, while in the core  
791 Papilionoideae, several accessions are represented by fully sequenced genomes and  
792 therefore have higher gene sampling. Alternatively, paralog copies for a subset of genes  
793 could have been lost in lineages outside the core Papilionoideae. These gene sampling  
794 issues mean that a considerable number of gene duplications are likely to be mapped  
795 onto the second and third divergences in the subfamily, even though they probably stem  
796 from the same WGD event shared by the subfamily as a whole. Similar patterns are  
797 apparent at the bases of the legumes and of Pentapetalae (Figs 3D & S9). At the bases  
798 of subfamily Caesalpinioideae and the Mimosoid clade, we also find modestly elevated  
799 numbers of gene duplications, but fewer than for the three main duplication events (Figs  
800 3D & S9). This could indicate a partial genome duplication shared by all  
801 Caesalpinioideae and another one shared by all mimosoids. Alternatively, it could reflect  
802 higher gene coverage in the mimosoid transcriptomes relative to the other  
803 Caesalpinioideae, in which case many of the gene duplications currently depicted as  
804 subtending the Mimosoid clade should potentially map at the base of the  
805 Caesalpinioideae. It is therefore possible that another WGD has occurred at the base of  
806 the Caesalpinioideae, as suggested by Cannon et al. (2015), but the rather low  
807 numbers of gene duplications inferred from our data cannot be considered as strong

38

## PHYLOGENOMIC COMPLEXITY AND POLYPLOIDY IN LEGUMES

808 evidence for that. Cannon et al. (2015) also hypothesized another WGD early in the  
809 evolution of subfamily Cercidoideae, shared by Cercis and Bauhinia. Our results do not  
810 support this, and furthermore, in Bauhinia s.l. (Cercidoideae) the most common haploid  
811 chromosome number is  $n=14$ , while Cercis has  $n = 7$ . This suggests that an early WGD  
812 in Cercidoideae was not shared by Cercis. This is further supported by a densely  
813 sampled phylogenetic analysis of the LegCyc gene in Cercidoideae, which is duplicated  
814 in all Cercidoideae except Cercis, the sister group to the rest of the subfamily (Carole  
815 Sinou, unpublished data). Cannon et al. (2015) further suggested that the ancestral  
816 legume most likely had a haploid chromosome number of  $n = 6$  or  $7$  and had  
817 independently doubled in most lineages to arrive at  $n = 14$ , the haploid chromosome  
818 number that is most commonly found across legume subfamilies except Detarioideae ( $n$   
819  $= 12$ ) and core Papilionoideae (Cannon et al., 2015: Fig. 1; chromosome counts for  
820 Duparquetia are not available). This would imply that Cercis, with  $n = 7$ , would have  
821 retained the ancestral haploid chromosome number. Indeed, given our results it is likely  
822 that the mrca of Cercidoideae and Detarioideae would have had a haploid chromosome  
823 number of  $6$  or  $7$ , followed by independent WGDs in Bauhinia s.l. and Detarioideae to  
824 arrive at  $n = 14$  and  $n = 12$ , respectively. However, the mrca of Dialioideae,  
825 Caesalpinioideae and Papilionoideae most likely had a haploid chromosome number of  
826  $n = 14$ , followed by reductions in chromosome number in Chamaecrista and  
827 Papilionoideae (Cannon et al., 2015: Fig. 1). Even after an additional WGD in  
828 Papilionoideae, extant members of the subfamily still have chromosome numbers  $<14$

39 KOENEN ET AL.

829 (Cannon et al., 2015: Fig. 1), suggesting extensive genomic rearrangement. That leaves  
830 the chromosome number of the mrca of all legumes uncertain, being either  $n = 6$  or 7, or  
831  $n = 14$ , suggesting either chromosome number reduction in some lineages, or  
832 potentially inheritance of different ploidy levels in different lineages from an ancestral  
833 polyploid complex. In conclusion, we find evidence that supports many of the findings of  
834 Cannon et al. (2015), but our results suggest an additional WGD event that is shared by  
835 all legumes, in line with the findings of Wong et al. (2017). Our study expands the taxon  
836 sampling of Cannon et al. (2015), but has the same limitation in that a large number of  
837 accessions are based on transcriptome data and are thus not sampling complete  
838 exomes. Denser sampling of completely sequenced legume genomes will be needed to  
839 resolve the number and placement of WGD events with higher confidence, precision  
840 and accuracy.

841

#### 842 *Estimating the Timeline of Legume Evolution*

843

844 Our divergence time analyses update previous analyses of Lavin et al. (2005),  
845 Bruneau et al. (2008) and Simon et al. (2009), and provide, to our knowledge, the first  
846 divergence time estimates for legumes based on nuclear genomic data as well as the  
847 first molecular clock dating estimate for the crown age of the legumes. The age  
848 estimates under the FLC models and the strict clock model are mostly rather similar, but  
849 the RLC and UCLN models, that relax the clock assumption more, lead to older



40

## PHYLOGENOMIC COMPLEXITY AND POLYPLOIDY IN LEGUMES

850 divergence time estimates. By allowing independent substitution rates on all branches,  
851 these models are potentially overfitting the data, to attempt to satisfy the marginal prior  
852 on node ages (Brown & Smith, 2017). As inferred from analyses run without data, the  
853 marginal prior that is constructed across all nodes of the tree, can be considered as  
854 “pseudo-data” (Brown & Smith, 2017), derived from the node calibration priors (based  
855 on fossil ages) and the branching process prior (constant birth-death model in our  
856 case), and should therefore not be overly informative on node ages. FLC and strict  
857 clock models lend greater weight to the molecular data and can overrule the marginal  
858 prior distributions on divergence times whilst still respecting hard maximum and  
859 minimum bounds of the fossil constraints on calibrated nodes, as suggested by our  
860 results. It is also clear from running analyses without data, that the marginal age prior  
861 on the (uncalibrated) crown node of the legumes is rather poorly informed, with the 95%  
862 HPD interval between 79.37-109.20 Ma (Fig. 6B), the minimum being much older than  
863 the oldest legume fossils, presumably caused by overly conservative maximum bounds  
864 on calibrated nodes (Phillips, 2015). UCLN and RLC analyses also inferred relatively  
865 high substitution rates for a few deep branches in the outgroup during the Lower  
866 Cretaceous, relative to the more derived and terminal branches of the tree (Figs S10 &  
867 S12), presumably to satisfy the poorly informed marginal priors. Phillips (2015)  
868 suggested that setting less conservative maxima on priors could remedy this problem,  
869 but our analysis with such prior settings shows little effect (Fig. S11), with some of the  
870 deepest branches still having much higher estimated substitution rates. Since there is

41 KOENEN ET AL.

871 no evidence, nor any reason to assume, that substitution rates along those branches  
872 should be elevated relative to terminal branches, we conclude that this is indeed caused  
873 by overfitting of rate heterogeneity across branches under the influence of the marginal  
874 prior. Furthermore, the RLC analyses fitted c. 45 local clocks across the phylogeny, a  
875 rather high number relative to the total of 142 branches in the tree (implying a separate  
876 clock for every 3 branches), which is also indicative of overfitting. At the same time, this  
877 could be seen as evidence that the data are not the product of clock-like evolution, but it  
878 becomes difficult to estimate how much the clock deviates if the marginal prior on node  
879 ages is too influential. A more pragmatic approach is to use FLC analyses, by defining  
880 local clocks based on root-to-tip length distributions across clades and pruning outlier  
881 taxa (see Methods and Fig. S19). This approach accounts in large part for the violation  
882 of the molecular clock but it does not relax the clock to the extent that the marginal prior  
883 on node ages is given excessive weight relative to the molecular signal. Furthermore,  
884 because the genes we selected for divergence time estimation are reasonably clock-like  
885 and highly informative, it is desirable that these data inform the node ages with sufficient  
886 weight. One drawback of using this approach is that the relatively large amount of  
887 sequence data in combination with the FLC model results in estimates that appear  
888 unrealistically precise, and the discovery of new fossils may well prove the legumes to  
889 be slightly older. Nevertheless, the evidence presented here suggests that the legume  
890 crown age dates back to the Maastrichtian or Early Paleocene, likely within one or two

42

## PHYLOGENOMIC COMPLEXITY AND POLYPLOIDY IN LEGUMES

891 million years before or after the KPB, although such high precision is not warranted due  
892 to the idiosyncrasies of the molecular clock.

893 Polyploidy (Senchina, et al., 2003) as well as the KPB itself (Berv & Field, 2018),  
894 have been implicated as potentially causing transient substitution rate increases, raising  
895 the possibility that substitution rates during the early evolution of the legumes could  
896 have deviated temporarily but markedly from the "background" rate of Cretaceous  
897 rosids. This would render the ages inferred for the first few dichotomies as well as those  
898 of the subfamilies less certain. The age estimates inferred for these nodes rely in large  
899 part on the assumption that the substitution rate did not vary significantly within the  
900 different clock partitions, and most importantly within the rosid partition which includes  
901 most of the branches along the backbone of the family and the stem lineage subtending  
902 it. The WGD events along the stem lineages of the family, and subfamilies  
903 Papilionoideae and Detarioideae could have affected substitution rates along those  
904 branches. By selecting for smaller stature and shorter generation times and reducing  
905 population sizes (Berv & Field, 2018), the KPB could additionally have resulted in  
906 increased rates along some or all of the stem lineages of the subfamilies, and, in the  
907 case of "hard" explosive diversification after the KPB, perhaps also along the legume  
908 stem lineage. A third factor that could influence node age estimates along the backbone  
909 of the family, is the strong gene tree incongruence observed for nodes B, E and F (Fig.  
910 5), which is also observed among the 36 genes that were used for time-scaling. The  
911 divergence time analyses need to accommodate this incongruence within a single

43 KOENEN ET AL.

912 topology, meaning that additional substitutions need to be inferred for conflicting gene  
913 trees, which can inflate the branch lengths between rapid speciation events (Mendes &  
914 Hahn, 2016). Taken together, these three factors could mean that the timeframe for the  
915 early evolution of the legumes appears inflated in our results, with (some of the)  
916 subfamily ages likely being slightly older than estimated here, as well as divergence of  
917 the subfamilies happening nearly instantaneously (hence the gene tree incongruence  
918 and lack of phylogenetic signal), rather than spanning the c. 3 -5 million years inferred  
919 here (Figs 6 & S10-17). Potentially, even the legume crown age could be slightly older  
920 due to the effects of polyploidy, but not due to the KPB, because if the crown is older,  
921 the stem lineage would not have crossed the KPB.

922 Different interpretations of Eocene fossils of Cercidoideae and Detarioideae (see  
923 Methods S1) lead to very different crown age estimates for these clades. As expected,  
924 this also leads to very different substitution rates along the stem lineages of these  
925 subfamilies, with rates increasing 10-fold when interpreting these fossils as crown group  
926 members. While it cannot be ruled out that the stem lineages of Cercidoideae and  
927 Detarioideae experienced such markedly elevated substitution rates, it is unlikely that  
928 rates were five times higher relative to the rest of the eudicots across all 36 nuclear  
929 genes analysed, especially as these genes were chosen because of their approximately  
930 clock-like evolution, and given that these two clades comprise long-lived woody  
931 perennials. The idea that molecular information from extant taxa could inform that  
932 particular fossils are too old to belong to a crown clade is controversial. However, the

44

## PHYLOGENOMIC COMPLEXITY AND POLYPLOIDY IN LEGUMES

933 test we have performed here is similar to the cross-validation method proposed by Near  
934 et al. (2005), which also uses molecular data to discover fossil calibration points that do  
935 not fit well with a larger set of fossils. Favouring those calibrations that do not lead to  
936 extreme substitution rate shifts is more parsimonious, and we believe that additional  
937 evidence is necessary to justify the inference of such a strong shift in substitution rates  
938 as that observed in the FLC8 analysis with alternative prior 1 (Fig. S16). While there  
939 seems little doubt that the Early Eocene fossils from the Mahenge in Tanzania and the  
940 Paris Basin in France do represent Cercidoideae and Detarioideae, the extreme  
941 substitution rate heterogeneity implied by their treatment as crown group members  
942 suggest that they may better be reinterpreted as stem-relatives of these subfamilies  
943 (see additional discussion about the affinities of these fossils in Supplementary Methods  
944 S1).

945

### 946 *The Impact of the KPB on Plant Diversification*

947

948 The impacts of the KPB mass extinction event on plant diversity are the focus of  
949 debate, with several studies claiming that extinction was less severe for plants than  
950 across marine and terrestrial faunas (Nicholls & Johnson, 2008; Cascales-Miñana &  
951 Cleal, 2014; Silvestro et al., 2015). However, our results suggest that the massive KPB  
952 turnover event likely played a critical role in the evolution of plant taxa. Our analyses  
953 indicate that the origin of crown group legumes is closely associated with the KPB. The

45 KOENEN ET AL.

954 analyses employing FLCs even suggest that potentially only a single legume ancestor  
955 crossed the KPБ to give rise to the six main lineages during the early Paleocene,  
956 conforming to a “hard explosive” model. However, across the different analyses, part of  
957 the posterior density of the crown age estimate falls in the late Maastrichtian,  
958 suggesting a “soft explosive” model, with the six main lineages diverging in the Late  
959 Cretaceous and crossing the KPБ, giving rise to the crown groups of the modern  
960 subfamilies in the Cenozoic. These different explosive models have been used to  
961 describe the origin and early diversification of the placental mammals, although other  
962 studies have lent support to “short fuse” or “long fuse” models (summarized in Phillips,  
963 2015: Fig. 1). For birds, the timing of diversification relative to the KPБ has also been  
964 controversial (Ksepka & Phillips, 2015), but it now appears likely that the Neoaves  
965 underwent explosive radiation from a single ancestor that crossed the KPБ (Suh, 2016).  
966 Apart from Placentalia and Neoaves, recent studies on frogs (Feng et al., 2017) and  
967 fishes (Alfaro et al., 2018) have also demonstrated rapid diversification following the  
968 KPБ, suggesting this is a common pattern across many terrestrial and marine animal  
969 groups. We present here, to our knowledge, the first example of a major plant family  
970 whose origin and initial diversification appears to be closely linked to the KPБ. This is  
971 notable because a recent family-level paleobotanical study suggested that the KPБ did  
972 not constitute a mass extinction event for plants (Cascales-Miñana & Cleal, 2014).  
973 Phylogenetic studies in some plant families originating in the Cretaceous also lack any  
974 evidence of a significant effect of the KPБ on diversification (e.g. Annonaceae

46

## PHYLOGENOMIC COMPLEXITY AND POLYPLOIDY IN LEGUMES

975 (Couvreur et al., 2011a) and Arecaceae (Couvreur et al., 2011b)), except for the smaller  
976 plant family Menispermaceae (Wang et al., 2012), which shows increased diversification  
977 following the KP. In contrast, fern diversification appears to have been strongly  
978 affected, with some groups of ferns showing much reduced diversity in the Cenozoic  
979 compared to earlier times (Lehtonen et al., 2017), and especially epiphytic groups of  
980 ferns showing increased diversification rates since the KP (Schuettpeitz & Pryer, 2009).  
981 Furthermore, the generic-level study of Silvestro et al. (2015) showed high extinction  
982 rates for non-flowering plant groups during the late Cretaceous, and elevated origination  
983 rates for angiosperms during the Paleocene, in line with the pattern we observe for the  
984 origins of legume diversity. Thus, even if extinction was less severe for plants than for  
985 animals at the KP, the Paleocene was nevertheless a time of major origination of  
986 lineages across biota, and we expect further examples of KP-related accelerated plant  
987 diversification to be discovered when inferring larger angiosperm timetrees.

988

989 *Implications for our Understanding of the Evolution of Legume Diversity and Traits*

990

991 Rapid divergence of the six main lineages of legumes is clearly relevant to our  
992 understanding of the evolution of legume diversity and the appearance of key traits.  
993 Over the last few decades, the prevailing characterization of legume evolution has been  
994 that of mimosoids and papilionoids as “derived” clades that evolved from a paraphyletic  
995 “grade” of caesalpinoid legumes (e.g. LPWG, 2013). However, we show that all six

47 KOENEN ET AL.

996 subfamilies diverged across a short time span after the origin of the legume crown  
997 group, with long stem lineages subtending each subfamily, suggesting that none of the  
998 modern subfamilies should be seen as diverging earlier or later than any other. The  
999 complex phylogenomic paleopolyploid tangle documented here means that it will be  
1000 extremely difficult to reconstruct trajectories of trait evolution across the first few  
1001 divergences within the family. For example, it is not clear how to understand the  
1002 evolution of floral diversity across the family and what the ancestral legume flower  
1003 would look like. That makes it questionable, for example, to what extent the specialized  
1004 and strongly canalized zygomorphic papilionoid flowers are derived within the family.  
1005 Fossil papilionoid flowers from the Paleocene (Crepet & Herendeen, 1992) are among  
1006 the oldest evidence of the family in the fossil record. The higher morphological diversity  
1007 of flowers in other subfamilies may well have evolved in parallel or even later than the  
1008 papilionoid flower, given the crown age estimates that we find in Bayesian clock  
1009 analyses (Figs 6, S10-17 and Table S3).

1010         While we are not able at this point to confidently distinguish between a “hard” or  
1011 “soft explosive” model of early diversification of the family, it is clear that the early  
1012 radiations of the legume subfamilies all occurred in the Cenozoic. While stem age  
1013 estimates of each subfamily are remarkably close to each other, crown age estimates  
1014 are strikingly different (but see the discussion above on potential effects of polyploidy  
1015 and the KPB on substitution rates and ages of subfamilies). Caesalpinioideae are found  
1016 to have the oldest crown age (late Paleocene), followed by Papilionoideae with a crown



48

## PHYLOGENOMIC COMPLEXITY AND POLYPLOIDY IN LEGUMES

1017 age in the Early Eocene. Both of these subfamilies therefore likely diversified  
1018 considerably during the PETM and Eocene climatic optimum, when tropical forests  
1019 extended far into the Northern Hemisphere. This is in line with the numerous legume  
1020 fossil taxa known from the Eocene of North America, often of uncertain affinities, but  
1021 with a majority ascribed to Caesalpinioideae and Papilionoideae (Herendeen, 1992).  
1022 There is also fossil evidence of Early and Middle Eocene stem-relatives of Cercidoideae  
1023 and Detarioideae (as discussed above and in Methods), but their crown group  
1024 divergences are most likely placed in the Late Eocene or Oligocene. Our results  
1025 suggest extinction of stem-relatives of these two subfamilies, most likely related to Late  
1026 Eocene and Oligocene cooling, and subsequent diversification of the crown groups  
1027 during the Oligocene and Miocene, when both groups become diverse at several fossil  
1028 sites (e.g. Wang et al., 2014; Lin et al., 2015; Poinar, 1991; Poinar and Brown, 2002).  
1029 Although it remains uncertain whether the crown group divergence of Detarioideae  
1030 occurred in the (Late) Eocene or the Oligocene, the younger age of the subfamily  
1031 inferred here contrasts with previous views of the evolutionary trajectories of this  
1032 subfamily dating back into the Paleocene, comprising relatively slowly evolving lineages  
1033 (de la Estrella et al., 2017), and with Amazonian subclades within Detarioideae  
1034 conforming to the museum model of tropical rainforest diversification (Schley et al.,  
1035 2018). This has important implications for our understanding of the origins of tropical  
1036 African plant diversity, since Detarioideae dominate the canopy of many equatorial  
1037 African rainforests, as well as being an important group in African savannas (de la

49 KOENEN ET AL.

1038 Estrella et al., 2017). Our results for Detarioideae suggest that the extant diversity in  
1039 tropical Africa, in particular the large diversity in tribe Amherstieae, is of relatively recent  
1040 origin following a major turnover event at the Eocene-Oligocene boundary, which also  
1041 affected other plant groups such as palms (Pan et al., 2006). This more recent  
1042 diversification of detarioids is also more in line with the widely proposed recent  
1043 assembly of the savanna biome (Cerling et al., 1997; Bouchenak-Khelladi et al., 2009;  
1044 Maurin et al., 2014).

1045

1046 *The Added Complications of Paleopolyploidy on Evolutionary Inferences in Deep Time*

1047

1048         The recent proliferation of genomic data is revealing just how prevalent repeated  
1049 WGDs have been in the history of the angiosperms (e.g. Wendel, 2015; Soltis et al.,  
1050 2016; Yang et al., 2018) and how many large angiosperm clades are characterized by  
1051 genome triplications (e.g. Pentapetalae, Brassicaceae, Asteraceae, Solanaceae). Here  
1052 we show that there were also multiple WGDs during the early history of the legumes,  
1053 including a WGD subtending the family as a whole. It has been suggested that  
1054 angiosperm WGDs are non-randomly distributed through time and significantly  
1055 clustered around the KPB (Fawcett et al., 2009; Vanneste et al., 2014; Lohaus & Van de  
1056 Peer, 2016). The WGD that we identify that is shared by all legumes is also temporally  
1057 close to the KPB (Fig. 6), lending further support to the idea that polyploid survival and  
1058 establishment were enhanced at or soon after the KPB with its associated rapid

50

## PHYLOGENOMIC COMPLEXITY AND POLYPLOIDY IN LEGUMES

1059 turnover of lineages (Lohaus & Van de Peer, 2016; Levin & Soltis, 2018). WGDs have  
1060 also been hypothesized to trigger accelerated rates of lineage diversification at least in  
1061 some lineages, albeit potentially after a time lag (Schranz et al., 2012; Tank et al., 2015;  
1062 Landis et al., 2018; Smith et al., 2018a). The three legume WGDs we detected are each  
1063 followed by rapid divergence of lineages as indicated by short internodes (Figs 2, 3 &  
1064 6). Polyploidy could have helped ancestral legumes and other plant lineages to both  
1065 survive the mass extinction event and rapidly diversify owing to differential gene loss  
1066 and other processes of diploidization (Adams & Wendel, 2005; Dodsworth et al., 2016).  
1067 Increased polyploid speciation and reduced diploid speciation in the wake of the KP  
1068 (Levin & Soltis, 2018) would then lead to over-representation of these WGD-derived  
1069 lineages in the extant flora and clustering of WGDs around the KP. On the other hand,  
1070 many paleopolyploidy events that significantly pre- and post-date the KP are known  
1071 (e.g. Angiospermae (Jiao et al., 2011), Pentapetalae (Jiao et al., 2012), Salicaceae  
1072 (Tuskan et al., 2006), Caryophyllales (Yang et al., 2018), *Gossypium* (Wendel, 2015)),  
1073 including in legumes (e.g. *Glycine*, Genisteeae, the *Leucaena* group, *Vachellia*), and  
1074 more extensive sampling of recently diversified groups may well reveal a weaker pattern  
1075 of clustering around the KP.

1076 The WGD events subtending all legumes and subfamilies Detarioideae and  
1077 Papilionoideae are likely to have contributed to the difficulties of obtaining phylogenetic  
1078 resolution for the deep nodes in these clades (Cardoso et al., 2012 & 2013; de la  
1079 Estrella 2018). WGDs may have promoted increased lineage diversification rates

51 KOENEN ET AL.

1080 resulting in short internodes and ILS. If the polyploidy event happened some time before  
1081 the first divergences in the legume family, or in the case of allopolyploidy, this could  
1082 have led to divergent gene copies prior to lineage splitting which should make orthology  
1083 detection easier. However, if the polyploidy event happened shortly before rapid  
1084 cladogenesis, potentially a large fraction of paralogous gene copies would not have  
1085 diverged at this point, making orthology detection challenging. In both cases,  
1086 paralogous or homoeologous gene copies will have subsequently been differentially  
1087 lost, pseudogenized or sub- or neo-functionalized, further complicating correct orthology  
1088 detection. Together with ILS, this could explain the large fraction of gene trees  
1089 supporting alternative topologies at the root of the legumes. It is notable that several  
1090 other large plant clades, such as Pentapetalae (Zeng et al., 2017), Asteraceae (Barker  
1091 et al., 2016; Huang et al., 2016) and Brassicaceae (Couvreur et al., 2010; Huang et al.,  
1092 2015), also appear to show similar lack of resolution in clades subtended by WGDs to  
1093 that revealed here for the legume family and subfamilies Papilionoideae and  
1094 Detarioideae. This suggests that the association of polyploidy with rapid divergence,  
1095 which leads to a lack of phylogenetic signal and gene tree conflict, is potentially a  
1096 common feature in the evolution of angiosperms and the origination of major plant  
1097 clades.

1098         A large number of homolog clusters do not show gene duplications at the base of  
1099 the legumes or any of the subfamilies, suggesting that loss of paralog copies is  
1100 widespread, as observed for ancient WGDs more generally (Adams & Wendel, 2005;

52

## PHYLOGENOMIC COMPLEXITY AND POLYPLOIDY IN LEGUMES

1101 Dehal & Boore, 2005; Brunet et al., 2006; Scannel et al., 2007). If many of those losses  
1102 occurred along the stem lineages of the six subfamilies after their divergence, this could  
1103 lead to different paralog copies being retained in different lineages, adding to conflict  
1104 among gene trees. Loss of paralog copies along stem lineages of subfamilies will also  
1105 make it difficult to distinguish whether a gene duplication corresponds to the WGD  
1106 shared by all legumes, or whether it represents a nested WGD such as those  
1107 subtending Detarioideae and Papilionoideae. Lack of support in those homolog trees  
1108 showing gene duplications further complicates this issue, making it potentially extremely  
1109 challenging to accurately reconstruct the history of WGDs. Given these difficulties,  
1110 sampling a wider range of complete genomes will be important, since with transcriptome  
1111 data it is unknown whether duplicate gene copies are lost or simply not expressed in the  
1112 tissue from which the RNA was extracted. Furthermore, increased taxon sampling will  
1113 help to counteract negative impacts of missing data, since particular duplicate gene  
1114 copies may have been lost in all species sampled here, but not necessarily across the  
1115 whole clade or subfamily which those species represent. Despite all these  
1116 complications, a clear pattern of either high or low numbers of gene duplications is  
1117 observed when mapping duplications from 8,038 extracted clades from homolog trees  
1118 across the species tree (Figs 3D & S8). This suggests that when summarizing gene  
1119 duplications over a sufficiently large data set, it is still possible to make sense of the  
1120 confusing topological differences that are observed and hence to accurately map WGD  
1121 events. This leads us to propose the hypothesis presented in Figure 7 to reconcile the

53 KOENEN ET AL.

1122 complicated topological patterns observed across gene trees. In this hypothesis, the six  
1123 major legume lineages (i.e. subfamilies) diverged rapidly one after another from a  
1124 polyploid ancestor. The different gene copies would still be nearly identical at the  
1125 moment of cladogenesis and would diverge into paralog copies in each lineage  
1126 independently, making it impossible to infer relationships between paralog copies from  
1127 different subfamilies, consistent with lack of phylogenetic signal in most clusters.  
1128 Coupled with differential loss of paralog copies, the diversity of topologies and the lack  
1129 of support that we observe in homolog trees is exactly what would be expected from the  
1130 sort of evolutionary history depicted in Figure 7.

1131         A polyploid ancestor reconciles the complex patterns of gene duplications  
1132 observed in the homolog clusters, suggesting we have six legume lineages derived from  
1133 a recently polyploidized ancestor. This raises a number of important questions: Did the  
1134 polyploidization event involve hybridization, leading to allopolyploidy? Was the ancestor  
1135 tetraploid or did it have a higher ploidy level? Did all six lineages inherit the same ploidy  
1136 level? Alternatively, given that polyploidization results in immediate reproductive  
1137 barriers, perhaps divergence of these six lineages was even facilitated by differing  
1138 ploidy levels, with all modern legume taxa derived from an ancestral polyploid complex?

1139         These questions are difficult to answer for an event that occurred 66 Ma and for  
1140 which much of the evidence has been obscured by subsequent genome reorganization  
1141 and loss of the large majority of duplicate gene copies. Over such timescales, it appears  
1142 nearly impossible to distinguish between autopolyploidization or allopolyploidization

54

## PHYLOGENOMIC COMPLEXITY AND POLYPLOIDY IN LEGUMES

1143 between two species that had only recently diverged, or multiple recurrent WGDs in a  
1144 polyploid complex, or even to disentangle the impacts of possible reticulation from the  
1145 effects of ILS. On the one hand, a hybridization event involving WGD could explain the  
1146 strong gene tree conflict that we observe. However, equally this conflict could be  
1147 explained by ILS alone. The first few divergences within the family occurred within less  
1148 than 5 Myr (Fig. 6 & S10-17), and this is probably an overestimate due to gene tree  
1149 incongruence (Mendes & Hahn, 2016). With a sufficiently large effective population size,  
1150 the majority of loci would not yet have reached reciprocal monophyly over such a short  
1151 time. Furthermore, the lack of resolution among the different gene copies in the majority  
1152 of homolog trees suggests that genes did not diverge significantly prior to the WGD,  
1153 therefore ruling out the possibility of allopolyploidization of two divergent lineages.

1154 We hypothesize a polyploid ancestor of all legumes, but the ploidy level of this  
1155 ancestor remains uncertain. Some of the gene trees suggest that multiple rounds of  
1156 WGD occurred at the base of the legumes, prior to further WGDs that occurred  
1157 independently in subfamilies Detarioideae and Papilionoideae (Fig. S8 E&F). Indeed, of  
1158 the 794 homolog trees in which pan-legume duplications occurred, for 166 trees more  
1159 than one duplication was mapped to the legume crown node. Some of these homolog  
1160 clusters have low support values, so not all of them lend strong support to multiple  
1161 rounds of WGD. Nevertheless, many of them clearly show more than two well  
1162 supported duplicated clusters per subfamily, including for subfamilies other than  
1163 Detarioideae and Papilionoideae. Therefore, the possibility of a hexaploid or octoploid

55 KOENEN ET AL.

1164 legume ancestor, akin to events in Angiospermae (Jiao et al., 2011), Pentapetalae (Jiao  
1165 et al., 2012), Asteraceae (Huang et al., 2016) and cotton (*Gossypium*) (Paterson et al.,  
1166 2012), should also be considered given the evidence presented here. To further  
1167 enhance knowledge on legume molecular biology and genome evolution, an obvious  
1168 next step will be to sequence multiple complete genomes for all six legume subfamilies  
1169 and the other Fabales families, something that will be forthcoming as part of the 10KP  
1170 initiative (Cheng et al., 2018). This would potentially make it possible to disentangle the  
1171 early genome evolution of legumes by comparing conserved syntenic blocks, detecting  
1172 genomic rearrangements and reconstructing chromosome evolution and the ancestral  
1173 legume karyotype, as has recently been done for vertebrates (Sacerdot et al., 2018)  
1174 and birds (Damas et al., 2018), as well as providing ample other opportunities to further  
1175 enhance our understanding of legume evolution and diversification.

1176 Ancient polyploidy not only provides a possible explanation for the difficulties in  
1177 resolving the root of the legumes, it could also explain the sudden appearance of  
1178 diverse legume fossil taxa in the Paleogene. A polyploid ancestor of all legumes would  
1179 have provided a much expanded genomic substrate for rapid evolution and  
1180 diversification of legume traits, with further rounds of genome duplication leading to an  
1181 even further expanded genomic evolutionary substrate independently in Papilionoideae  
1182 and Detarioideae and potentially several other legume lineages. In this sense the  
1183 parallels to the sudden rise of the angiosperms (Sanderson, 2015) are even more



56

## PHYLOGENOMIC COMPLEXITY AND POLYPLOIDY IN LEGUMES

1184 compelling given that angiosperms are also subtended by one or two ancient WGD  
1185 events (Jiao et al., 2011; Ruprecht et al., 2017).

1186

### 1187 *Concluding Remarks*

1188

1189 It is becoming increasingly clear that the origin and early evolution of the legumes  
1190 followed a complex scenario with multiple nested polyploidy events, and rapid  
1191 divergence of the six main lineages against the background of a mass extinction event  
1192 that led to major turnover in the Earth's biota and biomes. WGD likely contributed to the  
1193 survival and evolutionary diversification of the legumes in the wake of the KPB mass  
1194 extinction event, and contributed to the rise to ecological dominance of legumes in early  
1195 Cenozoic tropical forests. At the same time, these events make it more difficult to  
1196 reconstruct aspects of the early evolutionary history of the clade, including evolutionary  
1197 relationships, divergence time estimates and the phylogenetic location of the WGD  
1198 events themselves. The similarities between legumes and other major Cenozoic clades  
1199 such as mammals and birds are striking. All three of these prominent Cenozoic clades  
1200 show recalcitrant basal polytomies and parallel trajectories of rapid early divergence  
1201 closely associated with the KPB, further emphasizing the importance of the KPB mass  
1202 extinction event and the earth system succession that followed in its aftermath (Hull,  
1203 2015) in shaping the modern biota.

1204

57 KOENEN ET AL.

1205 **FUNDING**

1206

1207 This work was supported by the Swiss National Science Foundation (Grant  
1208 31003A\_135522 to C.E.H.); the Department of Systematic & Evolutionary Botany,  
1209 University of Zurich; the Natural Sciences and Engineering Research Council of Canada  
1210 (Grant to A.B.), the U.K. National Environment Research Council (Grant NE/I027797/1  
1211 to R.T.P.), and the Fonds de la Recherche Scientifique of Belgium (Grant J.0292.17 to  
1212 O.H.).

1213

1214 **ACKNOWLEDGEMENTS**

1215

1216 We thank the S3IT of the University of Zurich for the use of the ScienceCloud  
1217 computational infrastructure and the Functional Genomics Center Zurich (FGCZ) for  
1218 library preparation and sequencing.

1219

1220 **REFERENCES**

1221 Adams K.L., Wendel J.F. 2005. Polyploidy and genome evolution in plants. *Curr. Opin.*

1222 *Plant Biol.* 8(2):135–141.

1223 Alfaro M.E., Faircloth B.C., Harrington R.C., Sorenson L., Friedman M., Thacker C.E.,

1224 Oliveros C.H., Černý D., Near T.J. 2018. Explosive diversification of marine fishes

1225 at the Cretaceous–Palaeogene boundary. *Nat. Ecol. Evol.* 2:688–696.

58

PHYLOGENOMIC COMPLEXITY AND POLYPLOIDY IN LEGUMES

- 1226 Bankevich A., Nurk S., Antipov D., Gurevich A.A., Dvorkin M., Kulikov A.S., Lesin V.M.,  
1227 Nikolenko S.I., Pham S., Pribelski A.D., Pyshkin A.V., Sirotkin A.V., Vyahhi N.,  
1228 Tesler G., Alekseyev M.A., Pevzner PA. 2012. SPAdes: A New Genome  
1229 Assembly Algorithm and Its Applications to Single-Cell Sequencing. *J. Comput.*  
1230 *Biol.* 19(5):455–477.
- 1231 Barker M.S., Li Z., Kidder T.I., Reardon C.R., Lai Z., Oliveira L.O., Scascitelli M.,  
1232 Rieseberg L.H. 2016. Most Compositae (Asteraceae) are descendants of a  
1233 paleohexaploid and all share a paleotetraploid ancestor with the Calyceraceae.  
1234 *Am. J. Bot.* 103:1203–1211.
- 1235 Barreda V.D., Cúneo N.R., Wilf P., Currano E.D., Scasso R.A., Brinkhuis H. 2012.  
1236 Cretaceous/Paleogene Floral Turnover in Patagonia: Drop in Diversity, Low  
1237 Extinction, and a Classopollis Spike. *PLoS ONE* 7(12):e52455.
- 1238 Berv J.S., Field D.J. 2017. Genomic signature of an avian Lilliput Effect across the K-Pg  
1239 extinction. *Syst. Biol.* 67(1):1–13.
- 1240 Bolger A.M., Lohse M., Usadel B. 2014. Trimmomatic: a flexible trimmer for Illumina  
1241 sequence data. *Bioinformatics.* 30(15):2114–2120.
- 1242 Bouchenak-Khelladi Y., Anthony Verboom G., Hodkinson T.R., Salamin N., Francois O.,  
1243 Chonghaile G.N., Savolainen V. 2009. The origins and diversification of C4  
1244 grasses and savanna-adapted ungulates. *Glob. Change Biol.* 15(10):2397–2417.

59 KOENEN ET AL.

- 1245 Bousquet J., Strauss S.H., Doerksen A.H., Price R.A. 1992. Extensive variation in  
1246 evolutionary rate of rbcL gene sequences among seed plants. *Proc. Natl. Acad.*  
1247 *Sci. USA.* 89:7844–7848.
- 1248 Brea M., Zamuner A.B., Matheos S.D., Iglesias A., Zucol A.F. 2008. Fossil wood of the  
1249 Mimosoideae from the early Paleocene of Patagonia, Argentina. *Alcheringa.*  
1250 32:427–441.
- 1251 Brown J.W., Smith S.A. 2017. The past sure is tense: on interpreting phylogenetic  
1252 divergence time estimates. *Syst. Biol.* 67:340–353.
- 1253 Brown J.W., Walker J.F., Smith S.A. 2017. Phyx: phylogenetic tools for unix.  
1254 *Bioinformatics.* 33:1886–1888.
- 1255 Bruneau A., Mercure M., Lewis G.P., Herendeen P.S. 2008. Phylogenetic patterns and  
1256 diversification in the caesalpinoid legumes. *Botany.* 86:697–718.
- 1257 Brunet F.G., Crollius H.R., Paris M., Aury J.M., Gibert P., Jaillon O., Laudet V.,  
1258 Robinson-Rechavi M. 2006. Gene loss and evolutionary rates following whole-  
1259 genome duplication in teleost fishes. *Mol. Biol. Evol.* 23(9):1808–1816.
- 1260 Cannon S.B., Sterc L., Rombauts S., Sato S., Cheung F., Gouzy J., Wang X., Mudge J.,  
1261 Vasdewani J., Schiex T., Spannagl M. 2006. Legume genome evolution viewed  
1262 through the *Medicago truncatula* and *Lotus japonicus* genomes *Proc. Natl. Acad.*  
1263 *Sci. USA.* 103:14959–14964.
- 1264 Cannon S.B., McKain M.R., Harkess A., Nelson M.N., Dash S., Deyholos M.K., Peng Y.,  
1265 Joyce B., Stewart Jr C.N., Rolf M., Kutchan T. 2015. Multiple polyploidy events in

60

## PHYLOGENOMIC COMPLEXITY AND POLYPLOIDY IN LEGUMES

- 1266 the early radiation of nodulating and nonnodulating legumes. *Mol. Biol. Evol.*  
1267 32(1):193–210.
- 1268 Cardoso D., de Queiroz L.P., Pennington R.T., de Lima H.C., Fonty E., Wojciechowski  
1269 M.F., Lavin M. 2012. Revisiting the phylogeny of papilionoid legumes: New  
1270 insights from comprehensively sampled early-branching lineages. *Am. J. Bot.*  
1271 99:1991–2013.
- 1272 Cardoso D., Pennington R.T., de Queiroz L.P., Boatwright J.S., Van Wyk B.-E.,  
1273 Wojciechowski M.F., Lavin M. 2013. Reconstructing the deep-branching  
1274 relationships of the papilionoid legumes. *S. Afr. J. Bot.* 89:58–75.
- 1275 Cascales-Miñana B., Cleal C.J. 2014. The plant fossil record reflects just two great  
1276 extinction events. *Terra Nova.* 26:195–200.
- 1277 Cerling T.E., Harris J.M., Macfadden B.J., Leakey M.G., Quade J., Eisenmann V.,  
1278 Ehleringer J.R. 1997. Global vegetation change through the Miocene/Pliocene  
1279 boundary. *Nature.* 389:153–158.
- 1280 Cheng S., Melkonian M., Smith S.A., Brockington S., Archibald J.M., Delaux P.-M., Li F.-  
1281 W., Melkonian B., Mavrodiev E.V., Sun W., Fu Y., Yang H., Soltis D.E., Graham  
1282 S.W., Soltis P.S., Liu X., Xu X., Wong G.K.-S. 2018. 10KP: a phylodiverse  
1283 genome sequencing plan. *GigaScience.* 7:1–9.
- 1284 Christin P.-A., Spriggs E., Osborne C.P., Strömberg C.A.E., Salamin N., Edwards E.J.  
1285 2014. Molecular dating, evolutionary rates, and the age of the grasses. *Syst.*  
1286 *Biol.* 63:153–165.

61 KOENEN ET AL.

1287 Claramunt S., Cracraft J. 2015. A new time tree reveals Earth history's imprint on the  
1288 evolution of modern birds. *Sci. Adv.* 1(11):e1501005.

1289 Cooper A., Penny D. 1997. Mass survival of birds across the Cretaceous-Tertiary  
1290 Boundary: molecular evidence. *Science.* 275:1109–1113.

1291 Couvreur T.L.P., Franzke A., Al-Shehbaz I.A., Bakker F.T., Koch M.A., Mummenhoff K.  
1292 2010. Molecular phylogenetics, temporal diversification, and principles of  
1293 evolution in the mustard family (Brassicaceae). *Mol. Biol. Evol.* 27:55–71.

1294 Couvreur T.L.P., Pirie M.D., Chatrou L.W., Saunders R.M.K., Su Y.C.F., Richardson J.E.,  
1295 Erkens R.H.J. 2011a. Early evolutionary history of the flowering plant family  
1296 Annonaceae: steady diversification and boreotropical geodispersal. *J. Biogeogr.*  
1297 38:664–680.

1298 Couvreur T.L.P., Forest F., Baker W.J. 2011b. Origin and global diversification patterns  
1299 of tropical rain forests: inferences from a complete genus-level phylogeny of  
1300 palms. *BMC Biol.* 9:44.

1301 Crawley M. 1988. Palaeocene wood from the Republic of Mali. *Bull. Br. Mus. (Nat. Hist.)*  
1302 *Geol.* 44:3–14.

1303 Crepet W.L., Herendeen P.S. 1992. Papilionoid flowers from the early Eocene of  
1304 southeastern North America. In: Herendeen P.S., Dilcher D.L., editors, *Advances*  
1305 *in legume systematics part 4: The fossil record*. Richmond, UK: Royal Botanic  
1306 Gardens, Kew. p. 43–55.

62

## PHYLOGENOMIC COMPLEXITY AND POLYPLOIDY IN LEGUMES

- 1307 Criscuolo A., Gribaldo S. 2010. BMGE (Block Mapping and Gathering with Entropy): a  
1308 new software for selection of phylogenetic informative regions from multiple  
1309 sequence alignments. *BMC Evol. Biol.* 10:210.
- 1310 Damas J., Kim J., Farré M., Griffin D.K., Larkin D.M. 2018. Reconstruction of avian  
1311 ancestral karyotypes reveals differences in the evolutionary history of macro- and  
1312 microchromosomes. *Genome Biol.* 19(1):155.
- 1313 De Franceschi D., De Ploëg G. 2003. Origine de l'ambre des faciès sparnaciens  
1314 (Éocène inférieur) du Bassin de Paris: le bois de l'ambre producteur.  
1315 *Geodiversitas.* 25:633–647.
- 1316 Dehal P., Boore J.L. 2005. Two rounds of whole genome duplication in the ancestral  
1317 vertebrate. *PLoS Biol.* 3(10):e314.
- 1318 de la Estrella M., Forest F., Wieringa J.J., Fougère-Danezan M., Bruneau A. 2017.  
1319 Insights on the evolutionary origin of Detarioideae, a clade of ecologically  
1320 dominant tropical African trees. *New Phytol.* 214(4):1722–1735.
- 1321 de la Estrella M., Forest F., Klitgård B., Lewis G.P., Mackinder B.A., de Queiroz L.P.,  
1322 Bruneau A. 2018. A new phylogeny-based tribal classification of subfamily  
1323 Detarioideae, an early branching clade of florally diverse tropical arborescent  
1324 legumes. *Sci. Rep.* 8(1):6884.
- 1325 Dodsworth S, Chase M.W., Leitch A.R. 2016. Is post-polyploidization diploidization the  
1326 key to the evolutionary success of angiosperms? *Bot. J. Linn. Soc.* 180(1):1–5.

63 KOENEN ET AL.

- 1327 dos Reis M., Donoghue P.C.J., Yang Z. 2014. Neither phylogenomic nor  
1328 palaeontological data support a Palaeogene origin of placental mammals. *Biol.*  
1329 *Lett.* 10:20131003.
- 1330 Drummond A.J., Suchard M.A., Xie D., Rambaut A. 2012. Bayesian phylogenetics with  
1331 BEAUti and the BEAST 1.7. *Mol. Biol. Evol.* 29:1969–1973.
- 1332 Dugas D.V., Hernandez D., Koenen E.J., Schwarz E., Straub S., Hughes C.E., Jansen  
1333 R.K., Nageswara-Rao M., Staats M., Trujillo J.T., Hajrah N.H. 2015. Mimosoid  
1334 legume plastome evolution: IR expansion, tandem repeat expansions, and  
1335 accelerated rate of evolution in *clpP*. *Sci. Rep.* 5:16958.
- 1336 Fawcett J.A., Maere S., Van de Peer Y. 2009. Plants with double genomes might have  
1337 had a better chance to survive the Cretaceous – Tertiary extinction event. *Proc.*  
1338 *Natl. Acad. Sci. USA.* 106:5737–5742.
- 1339 Feng Y.-J., Blackburn D.C., Liang D., Hillis D.M., Wake D.B., Cannatella D.C., Zhang P.  
1340 2017. Phylogenomics reveals rapid, simultaneous diversification of three major  
1341 clades of Gondwanan frogs at the Cretaceous–Paleogene boundary. *Proc. Natl.*  
1342 *Acad. Sci. USA.* 114(29):E5864–E5870.
- 1343 Grabherr M.G., Haas B.J., Yassour M., Levin J.Z., Thompson D.A., Amit I., Adiconis X.,  
1344 Fan L., Raychowdhury R., Zeng Q., Chen Z., Mauceli E., Hacohen N., Gnirke A.,  
1345 Rhind N., di Palma F., Birren B.W., Nusbaum C., Lindblad-Toh K., Friedman N.,  
1346 Regev A. 2011. Trinity: reconstructing a full-length transcriptome without a  
1347 genome from RNA-Seq data. *Nat. Biotechnol.* 29(7):644–652.



64

PHYLOGENOMIC COMPLEXITY AND POLYPLOIDY IN LEGUMES

- 1348 Herendeen P.S., Dilcher D.L. 1992. *Advances in legume systematics part 4. The fossil*  
1349 *record*. Richmond, UK: Royal Botanic Gardens, Kew..
- 1350 Herendeen P.S. 1992. The fossil history of the Leguminosae from the Eocene of  
1351 southeastern North America. In: Herendeen P.S., Dilcher D.L., editors, *Advances*  
1352 *in legume systematics part 4. The fossil record*. Richmond, UK: Royal Botanic  
1353 Gardens, Kew. pp. 85–160.
- 1354 Herendeen P.S., Jacobs B.F. 2000. Fossil legumes from the Middle Eocene (46.0 Ma)  
1355 Mahenge Flora of Singida, Tanzania. *Am. J. Bot.* 87:1358–1366.
- 1356 Huang C.-H., Sun R., Hu Y., Zeng L., Zhang N., Cai L., Zhang Q., Koch M.A., Al-  
1357 Shehbaz I., Edger P.P., Pires J.C., Tan D.-Y., Zhong Y., Ma H. 2015. Resolution of  
1358 Brassicaceae phylogeny using nuclear genes uncovers nested radiations and  
1359 supports convergent morphological evolution. *Mol. Biol. Evol.* 33:394–412.
- 1360 Huang C.-H., Zang C., Liu M., Hu Y., Gao T., Qi J., Ma H. 2016. Multiple polyploidization  
1361 events across Asteraceae with two nested events in the early history revealed by  
1362 nuclear phylogenomics. *Mol. Biol. Evol.* 33:2820–2835.
- 1363 Hull P. 2015. Life in the aftermath of mass extinctions. *Curr. Biol.* 25:R941–R952.
- 1364 Jacobs B.F., Herendeen P.S. 2004. Eocene dry climate and woodland vegetation in  
1365 tropical Africa reconstructed from fossil leaves from northern Tanzania.  
1366 *Palaeogeogr. Palaeocl.* 213:115–123.

65 KOENEN ET AL.

- 1367 Jarvis E.D., Mirarab S., Aberer A.J., Li B., Houde P., Li C., Ho S.Y., Faircloth B.C.,  
1368 Nabholz B., Howard J.T., Suh A. 2014. Whole genome analyses resolve the early  
1369 branches in the tree of life of modern birds. *Science*. 346:1320–1331.
- 1370 Jetz W., Thomas G.H., Joy J.B., Hartmann K., Mooers A.O. 2012. The global diversity of  
1371 birds in space and time. *Nature*. 491(7424):444–448.
- 1372 Jia H., Manchester S.R. 2014. Fossil Leaves and Fruits of *Cercis* L. (Leguminosae)  
1373 from the Eocene of Western North America. *Int. J. Plant Sci.* 175:601–612.
- 1374 Jiao Y., Wickett N.J., Ayyampalayam S., Chanderbali A.S., Landherr L., Ralph P.E.,  
1375 Tomsho L.P., Hu Y., Liang H., Soltis P.S., Soltis D.E., Clifton S.W., Schlarbaum  
1376 S.E., Schuster S.C., Ma H., Leebens-Mack J., dePamphilis C.W. 2011. Ancestral  
1377 polyploidy in seed plants and angiosperms. *Nature*. 473:97–100.
- 1378 Jiao Y., Leebens-Mack J., Ayyampalayam S., Bowers J.E., McKain M.R., McNeal J.,  
1379 Rolf M., Ruzicka D.R., Wafula E., Wickett N.J., Wu X., Zhang Y., Wang J., Zhang  
1380 Y., Carpenter E.J., Deyholos M.K., Kutchan T.M., Chanderbali A.S., Soltis P.S.,  
1381 Stevenson D.W., McCombie R., Pires J.C., Wong G.K.-S., Soltis D.E.,  
1382 DePamphilis C.W. 2012. A genome triplication associated with early  
1383 diversification of the core eudicots. *Genome Biol.* 13(1):R3.
- 1384 Katoh K., Standley D.M. 2013. MAFFT multiple sequence alignment software version 7:  
1385 improvements in performance and usability. *Mol. Biol. Evol.* 30(4):772–780.
- 1386 Keller G. 2014. Deccan volcanism, the Chicxulub impact, and the end-Cretaceous mass  
1387 extinction: Coincidence? Cause and effect?, in Keller G., and Kerr A.C., eds.,

66

## PHYLOGENOMIC COMPLEXITY AND POLYPLOIDY IN LEGUMES

- 1388 Volcanism, Impacts, and Mass Extinctions: Causes and Effects. *Geol. S. Am. S.*  
1389 505:57–89.
- 1390 Ksepka D.T., Phillips M.J. 2015. Avian diversification patterns across the K-Pg  
1391 boundary: influence of calibrations, datasets, and model misspecification. *Ann.*  
1392 *Mo. Bot. Gard.* 100(4):300–328.
- 1393 Landis J.B., Soltis D.E., Li Z., Marx H.E., Barker M.S., Tank D.C., Soltis P.S. 2018.  
1394 Impact of whole-genome duplication events on diversification rates in  
1395 angiosperms. *Am. J. Bot.* 105(3):348–363.
- 1396 Lanfear R., Ho S.Y.W., Davies T.J., Moles A.T., Aarssen L., Swenson N.G., Warman L.,  
1397 Zanne A.E., Allen A.P. 2013. Taller plants have lower rates of molecular evolution.  
1398 *Nat. Commun.* 4:1879.
- 1399 Lanfear R., Frandsen P.B., Wright A.M., Senfeld T., Calcott B. 2017. PartitionFinder 2:  
1400 new methods for selecting partitioned models of evolution for molecular and  
1401 morphological phylogenetic analyses. *Mol. Biol. Evol.* 34(3):772–773.
- 1402 Lartillot N., Philippe H. 2004. A Bayesian mixture model for across-site heterogeneities  
1403 in the amino-acid replacement process. *Mol. Biol. Evol.* 21:1095–1109.
- 1404 Lartillot N., Rodrigue N., Stubbs D., Richer J. 2013. PhyloBayes MPI: phylogenetic  
1405 reconstruction with infinite mixtures of profiles in a parallel environment. *Syst.*  
1406 *Biol.* 62:611–615.

67 KOENEN ET AL.

- 1407 Lassmann T., Hayashizaki Y., Daub C.O. 2009. TagDust—a program to eliminate  
1408 artifacts from next generation sequencing data. *Bioinformatics*. 25(21):2839–  
1409 2840.
- 1410 Lavin M., Wojciechowski M.F., Gasson P., Hughes C., Wheeler E. 2003. Phylogeny of  
1411 robinoid legumes (Fabaceae) revisited: *Coursetia* and *Gliricidia* recircumscribed,  
1412 and a biogeographical appraisal of the Caribbean endemics. *Syst. Bot.* 28:387–  
1413 409.
- 1414 Lavin M., Herendeen P.S., Wojciechowski M.F. 2005. Evolutionary rates analysis of  
1415 Leguminosae implicates a rapid diversification of lineages during the Tertiary.  
1416 *Syst. Biol.* 54:575–594.
- 1417 Le Q., Dang C., Gascuel O. 2012. Modeling protein evolution with several amino acid  
1418 replacement matrices depending on site rates. *Mol. Biol. Evol.* 29:2921–2936.
- 1419 Lehtonen S., Silvestro D., Karger D.N., Scotese C., Tuomisto H., Kessler M., Peña C.,  
1420 Wahlberg N., Antonelli A. 2017. Environmentally driven extinction and  
1421 opportunistic origination explain fern diversification patterns. *Sci. Rep.* 7(1):4831.
- 1422 Levin D.A., Soltis D.E. 2018. Factors promoting polyploid persistence and diversification  
1423 and limiting diploid speciation during the K–Pg interlude. *Curr. Opin. Plant Biol.*  
1424 42:1–7.
- 1425 Lin Y., Wong W.O., Shi G., Shen S., Li Z. 2015. Bilobate leaves of *Bauhinia*  
1426 (Leguminosae, Caesalpinioideae, Cercideae) from the middle Miocene of Fujian

68

## PHYLOGENOMIC COMPLEXITY AND POLYPLOIDY IN LEGUMES

- 1427 Province, southeastern China and their biogeographic implications. *BMC Evol.*  
1428 *Biol.* 15:252.
- 1429 Lohaus R., Van de Peer Y. 2016. Of dups and dinos: evolution at the K/Pg boundary.  
1430 *Curr. Opin. Plant Biol.* 30:62–69.
- 1431 LPWG (Legume Phylogeny Working Group). 2013. Legume phylogeny and  
1432 classification in the 21st century: progress, prospects and lessons for other  
1433 species-rich clades. *Taxon.* 62:217–248.
- 1434 LPWG (Legume Phylogeny Working Group). 2017. A new subfamily classification of the  
1435 Leguminosae based on a taxonomically comprehensive phylogeny. *Taxon.*  
1436 66:44–77.
- 1437 Maddison W.P. 1997. Gene trees in species trees. *Syst. Biol.* 46(3):523–536.
- 1438 Magallón S., Gómez-Acevedo S., Sánchez-Reyes L.L., Hernández-Hernández T. 2015.  
1439 A metacalibrated time-tree documents the early rise of flowering plant  
1440 phylogenetic diversity. *New Phytol.* 207:437–453.
- 1441 Maurin O., Davies T.J., Burrows J.E., Daru B.H., Yessoufou K., Muasya A.M., Bank M.,  
1442 Bond W.J. 2014. Savanna fire and the origins of the ‘underground forests’ of  
1443 Africa. *New Phytol.* 204(1):201–214.
- 1444 McElwain J.C., Punyasena S.W. 2007. Mass extinction events and the plant fossil  
1445 record. *Trends Ecol. Evol.* 22:548–557.
- 1446 McKey D. 1994. Legumes and nitrogen: The evolutionary ecology of a nitrogen-  
1447 demanding lifestyle. In: Sprent J.I., McKey D., editors. *Advances in legume*

69 KOENEN ET AL.

- 1448 *systematics part 5. The nitrogen factor*. Richmond, UK: Royal Botanic Gardens,  
1449 Kew. p. 211–228.
- 1450 Mendes F.K., Hahn M.W. 2016. GVajda V., Bercovici A. 2014. The global vegetation  
1451 pattern across the Cretaceous–Paleogene mass extinction interval: A template  
1452 for other extinction events. *Global and Planet. Change*. 122:29-49.  
1453 discordance causes apparent substitution rate variation. *Syst. Biol.* 65(4):711–  
1454 721.
- 1455 Meredith R.W., Janecka J.E., Gatesy J., Ryder O.A., Fisher C.A., Teeling E.C., Goodbla  
1456 A., Eizirik E., Simão TL., Stadler T., Rabosky D.L. 2011. Impacts of the  
1457 Cretaceous Terrestrial Revolution and KPg extinction on mammal diversification.  
1458 *Science*. 334(6055):521–524.
- 1459 Miller J.T., Murphy D.J., Ho S.Y.W., Cantrill D.J., Seigler D. 2013. Comparative dating of  
1460 *Acacia*: combining fossils and multiple phylogenies to infer ages of clades with  
1461 poor fossil records. *Aust. J. Bot.* 61:436–445.
- 1462 Mirarab S., Reaz R., Bayzid M.dS., Zimmermann T., Swenson M.S., Warnow T. 2014.  
1463 ASTRAL: genome-scale coalescent-based species tree estimation.  
1464 *Bioinformatics*. 30:i541–i548.
- 1465 Moore M.J., Soltis P.S., Bell C.D., Burleigh J.G., Soltis D.E. 2010. Phylogenetic analysis  
1466 of 83 plastid genes further resolves the early diversification of eudicots. *Proc.*  
1467 *Natl. Acad. Sci. USA*. 107:4623–4628.

70

PHYLOGENOMIC COMPLEXITY AND POLYPLOIDY IN LEGUMES

- 1468 Moore A.J., De Vos J.M., Hancock L.P., Goolsby E., Edwards E.J. 2017. Targeted  
1469 enrichment of large gene families for phylogenetic inference: phylogeny and  
1470 molecular evolution of photosynthesis genes in the portullugo clade  
1471 (Caryophyllales). *Syst. Biol.* 67:367–383.
- 1472 Mudge J., Cannon S.B., Kalo P., Oldroyd G.E.D., Roe B.A., Town C.D and Young N.D.  
1473 2005. Highly syntenic regions in the genomes of soybean, *Medicago truncatula*,  
1474 and *Arabidopsis thaliana*. *BMC Plant Biol.* 5:15.
- 1475 Near T.J., Meylan P.A., Shaffer H.B., Meyer A.E.A. 2005. Assessing concordance of  
1476 fossil calibration points in molecular clock studies: An Example Using Turtles.  
1477 *Am. Nat.* 165(2):137–146.
- 1478 Nicholls D.J., Johnson K.R. 2008. *Plants and the K-T boundary*. Cambridge, UK:  
1479 Cambridge University Press.
- 1480 O'leary M.A., Bloch J.I., Flynn J.J., Gaudin T.J., Giallombardo A., Giannini N.P.,  
1481 Goldberg S.L., Kraatz B.P., Luo Z.X., Meng J., Ni X. 2013. The placental mammal  
1482 ancestor and the post–K-Pg radiation of placentals. *Science* 339(6120):662–667.
- 1483 Pamilo P., Nei M. 1988. Relationships between gene trees and species trees. *Mol. Biol.*  
1484 *Evol.* 5(5):568–583.
- 1485 Pan A.D., Jacobs B.F., Dransfield J., Baker WJ. 2006. The fossil history of palms  
1486 (Arecaceae) in Africa and new records from the Late Oligocene (28–27 Mya) of  
1487 north-western Ethiopia. *Bot. J. Linn. Soc.* 151(1):69–81.

71 KOENEN ET AL.

- 1488 Paterson AH., Wendel J.F., Gundlach H., Guo H., Jenkins J., Jin D., Llewellyn D.,  
1489 Showmaker K.C., Shu S., Udall J., Yoo .MJ. 2012. Repeated polyploidization of  
1490 *Gossypium* genomes and the evolution of spinnable cotton fibres. *Nature*.  
1491 492(7429):423–427.
- 1492 Phillips M.J. 2015. Geomolecular dating and the origin of placental mammals. *Syst.*  
1493 *Biol.* 65(3):546–557.
- 1494 Phillips M.J., Fruciano C. 2018. The soft explosive model of placental mammal  
1495 evolution. *BMC Evol. Biol.* 18:104.
- 1496 Poinar Jr G.O. 1991. *Hymenaea protera* sp. n. (Leguminosae, Caesalpinioideae)  
1497 from Dominican amber has African affinities. *Experientia* 47:1075–1082.
- 1498 Poinar Jr G.O., Brown A.E. 2002. *Hymenaea mexicana* sp. nov. (Leguminosae:  
1499 Caesalpinioideae) from Mexican amber indicates Old World connections. *Bot. J.*  
1500 *Linn. Soc.* 139:125–132.
- 1501 Pollard D.A., Iyer V.N., Moses A.M., Eisen M.B. 2006. Widespread discordance of gene  
1502 trees with species tree in *Drosophila*: evidence for incomplete lineage sorting.  
1503 *PLoS Genet.* 2(10):e173.
- 1504 Prum R.O., Berv J.S., Dornburg A., Field D.J., Townsend J.P., Lemmon E.M., Lemmon  
1505 A.R. 2015. A comprehensive phylogeny of birds (Aves) using targeted next-  
1506 generation DNA sequencing. *Nature*. 526:569–573.



72

## PHYLOGENOMIC COMPLEXITY AND POLYPLOIDY IN LEGUMES

- 1507 Rambaut A., Drummond A.J., Xie D., Baele G., Suchard M.A. 2018. Posterior  
1508 summarisation in Bayesian phylogenetics using Tracer 1.7. *Syst. Biol.* 67(5):901–  
1509 904.
- 1510 Ranwez V., Harispe S., Delsuc F., Douzery E.J.P. 2011. MACSE: Multiple Alignment of  
1511 Coding SEquences Accounting for Frameshifts and Stop Codons. *PLoS ONE*  
1512 6(9): e22594.
- 1513 Rokas A., Carroll S.B. 2006. Bushes in the Tree of Life. *PLoS Biol.* 4:e352.
- 1514 Ruprecht C., Lohaus R., Vanneste K., Mutwil M., Nikoloski Z., Van de Peer Y., Persson  
1515 S. 2017. Revisiting ancestral polyploidy in plants. *Sci. Adv.* 3(7):e1603195.
- 1516 Sacerdot C., Louis A., Bon C., Berthelot C., Crollius H.R. 2018. Chromosome evolution  
1517 at the origin of the ancestral vertebrate genome. *Genome Biol.* 19(1):166.
- 1518 Salichos L., Rokas A. 2013. Inferring ancient divergences requires genes with strong  
1519 phylogenetic signals. *Nature.* 497(7449):327–331.
- 1520 Sanderson M.J. 2015. Back to the past: a new take on the timing of flowering plant  
1521 diversification. *New Phytol.* 207(2):257–259.
- 1522 Sayyari E., Mirarab S. 2016. Fast coalescent-based computation of local branch support  
1523 from quartet frequencies. *Mol. Biol. Evol.* 33:1654–1668.
- 1524 Sayyari E., Whitfield J. B., Mirarab S. 2018. DiscoVista: Interpretable visualizations of  
1525 gene tree discordance. *Mol. Phylogenet. Evol.* 122:110–115.
- 1526 Scannell D.R., Frank A.C., Conant G.C., Byrne K.P., Woolfit M., Wolfe K.H. 2007.  
1527 Independent sorting-out of thousands of duplicated gene pairs in two yeast

73 KOENEN ET AL.

- 1528 species descended from a whole-genome duplication. *Proc. Natl. Acad. Sci.*  
1529 *USA*. 104(20):8397–8402.
- 1530 Schley R.J., de la Estrella M., Pérez-Escobar O.A., Bruneau A., Barraclough T., Forest  
1531 F., Klitgård B. 2018. Is Amazonia a ‘museum’ for Neotropical trees? The evolution  
1532 of the Brownea clade (Detarioideae, Leguminosae). *Mol. Phylogenet. Evol.*  
1533 126:279–292.
- 1534 Schmieder R., Edwards R. 2011. Quality control and preprocessing of metagenomic  
1535 datasets. *Bioinformatics*. 27(6):863–864.
- 1536 Schranz M.E., Mohammadin S., Edger P.P. 2012. Ancient whole genome duplications,  
1537 novelty and diversification: the WGD Radiation Lag-Time Model. *Curr. Opin.*  
1538 *Plant Biol.* 15:147–153.
- 1539 Schwarz E.N., Ruhlman T.A., Weng M.-L., Khiyami M.A., Sabir J.S.M., Hajarrah N.H.,  
1540 Alharbi N.S., Rabah S.O., Jansen R.K. 2017. Plastome-wide nucleotide  
1541 substitution rates reveal accelerated rates in Papilionoideae and correlations  
1542 with genome features across legume subfamilies. *J. Mol. Evol.* 84:187–203.
- 1543 Schuettpelz E., Pryer K.M. 2009. Evidence for a Cenozoic radiation of ferns in an  
1544 angiosperm-dominated canopy. *Proc. Natl. Acad. Sci. USA*. 106(27):11200–  
1545 11205.
- 1546 Senchina D.S., Alvarez I., Cronn R.C., Liu B., Rong J., Noyes R.D., Paterson A.H., Wing  
1547 R.A., Wilkins T.A., Wendel J.F. 2003. Rate variation among nuclear genes and  
1548 the age of polyploidy in *Gossypium*. *Mol. Biol. Evol.* 20(4):633–643.

74

PHYLOGENOMIC COMPLEXITY AND POLYPLOIDY IN LEGUMES

- 1549 Silvestro D., Cascales-Miñana B., Bacon C.D., Antonelli A. 2015. Revisiting the origin  
1550 and diversification of vascular plants through a comprehensive Bayesian analysis  
1551 of the fossil record. *New Phytol.* 207(2):425–436.
- 1552 Simon M.F., Grether R., de Queiroz L.P., Skema C., Pennington R.T., Hughes C.E.  
1553 2009. Recent assembly of the Cerrado, a Neotropical plant diversity hotspot, by  
1554 in situ evolution of adaptations to fire. *Proc. Natl. Acad. Sci. USA.* 106:20359–  
1555 20364.
- 1556 Smith S.A., Donoghue M.J. 2008. Rates of molecular evolution are linked to life history  
1557 in flowering plants. *Science.* 322:86–89.
- 1558 Smith S.A., Moore M.J., Brown J.W., Yang Y. 2015. Analysis of phylogenomic datasets  
1559 reveals conflict, concordance, and gene duplications with examples from animals  
1560 and plants. *BMC Evol. Biol.* 15:150.
- 1561 Smith S.A., Brown J.W., Yang Y., Bruenn R., Drummond C.P., Brockington S.F., Walker  
1562 J.F., Last N., Douglas N.A., Moore M.J. 2018a. Disparity, diversity, and  
1563 duplications in the Caryophyllales. *New Phytol.* 217(2):836–854.
- 1564 Smith S.A., Brown J.W., Walker J.F. 2018b. So many genes, so little time: a practical  
1565 approach to divergence-time estimation in the genomic era. *PLoS One.*  
1566 13(5):e0197433.
- 1567 Soltis D.E., Visger C.J., Marchant D.B., Soltis P.S. 2016. Polyploidy: pitfalls and paths to  
1568 a paradigm. *Am. J. Bot.* 103:1146–1166.

75 KOENEN ET AL.

- 1569 Springer M.S., Meredith R.W., Teeling E.C., Murphy W.J. 2013. Technical comment on  
1570 “The placental mammal ancestor and the post–K-Pg radiation of placentals”.  
1571 *Science*. 341:613.
- 1572 Stamatakis A. 2014. RAxML Version 8: A tool for phylogenetic analysis and post-  
1573 analysis of large phylogenies. *Bioinformatics*. 30:1312–1313.
- 1574 Suh A., Smeds L., Ellegren H. 2015. The dynamics of incomplete lineage sorting across  
1575 the ancient adaptive radiation of neoavian birds. *PLoS Biol.* 13(8):e1002224.
- 1576 Suh A. 2016. The phylogenomic forest of bird trees contains a hard polytomy at the root  
1577 of Neoaves. *Zool. Scr.* 45:50–62.
- 1578 Sukumaran J., Holder M.T. 2010. DendroPy: A Python library for phylogenetic  
1579 computing. *Bioinformatics*. 26:1569–1571.
- 1580 Tank D.C., Eastman J.M., Pennell M.W., Soltis P.S., Soltis D.E., Hinchliff C.E., Brown  
1581 J.W., Sessa E.B., Harmon L.J. 2015. Nested radiations and the pulse of  
1582 angiosperm diversification: increased diversification rates often follow whole  
1583 genome duplications. *New Phytol.* 207:454–467.
- 1584 Teeling E.C., Hedges S.B. 2013. Making the impossible possible: rooting the tree of  
1585 placental mammals. *Mol. Biol. Evol.* 30:1999–2000.
- 1586 Tuskan G.A., Difazio S., Jansson S., Bohlmann J., Grigoriev I., Hellsten U., Putnam N.,  
1587 Ralph S., Rombauts S., Salamov A., Schein J. 2006. The genome of black  
1588 cottonwood, *Populus trichocarpa* (Torr. & Gray). *Science*. 313(5793):1596–1604.

76

PHYLOGENOMIC COMPLEXITY AND POLYPLOIDY IN LEGUMES

- 1589 Vajda V., Raine J.I., Hollis C.J. 2001. Indication of global deforestation at the  
1590 Cretaceous-Tertiary boundary by New Zealand fern spike. *Science*. 294:1700–  
1591 1702.
- 1592 Vajda V., Bercovici A. 2014. The global vegetation pattern across the Cretaceous–  
1593 Paleogene mass extinction interval: A template for other extinction events. *Global  
1594 and Planet. Change*. 122:29–49.
- 1595 Vanneste K., Baele G., Maere S., Van de Peer Y. 2014. Analysis of 41 plant genomes  
1596 supports a wave of successful genome duplications in association with the  
1597 Cretaceous–Paleogene boundary. *Genome Res*. 24(8):1334–1347.
- 1598 Wang H., Moore M.J., Soltis P.S., Bell C.D., Brockington S.F., Alexandre R., Davis C.C.,  
1599 Latvis M., Manchester S.R., Soltis D.E. 2009. Rosid radiation and the rapid rise  
1600 of angiosperm-dominated forests. *Proc. Natl. Acad. Sci. USA*. 106(10):3853–  
1601 3858.
- 1602 Wang W., Ortiz R.D.C., Jacques F.M.B., Xiang X.-G., Li H.-L., Lin L., Li R.-Q., Liu Y.,  
1603 Soltis P.S., Soltis D.E., Chen Z.-D. 2012. Menispermaceae and the diversification  
1604 of tropical rainforests near the Cretaceous–Paleogene boundary. *New Phytol*.  
1605 195:470–478.
- 1606 Wang Q., Song Z., Chen Y., Shen S., Li Z. 2014. Leaves and fruits of *Bauhinia*  
1607 (Leguminosae, Caesalpinioideae, Cercideae) from the Oligocene Ningming  
1608 Formation of Guangxi, South China and their biogeographic implications. *BMC  
1609 Evol. Biol*. 14:88.

77 KOENEN ET AL.

- 1610 Wang Y.-H., Wicke S., Wang H., Jin J.-J., Chen S.-Y., Zhang S.-D., Li D.-Z., Yi T.-S.  
1611 2018. Plastid genome evolution in the early-diverging legume subfamily  
1612 Cercidoideae (Fabaceae). *Front. Plant Sci.* 9:138.
- 1613 Wendel J.F. 2015. The wondrous cycles of polyploidy in plants. *Am. J. Bot.* 102:1753–  
1614 1756.
- 1615 Whitfield J., Cameron S.A., Huson D., Steel M. 2008. Filtered Z-closure supernetworks  
1616 for extracting and visualizing recurrent signal from incongruent gene trees. *Syst.*  
1617 *Biol.* 57:939–947.
- 1618 Wilf P., Johnson K.R. 2004. Land plant extinction at the end of the Cretaceous: a  
1619 quantitative analysis of the North Dakota megafloreal record. *Paleobiology.*  
1620 30:347–368.
- 1621 Wing S.L., Herrera F., Jaramillo C.A., Gómez-Navarro C., Wilf P., Labandeira C.C. 2009.  
1622 Late Paleocene fossils from the Cerrejón Formation, Colombia, are the earliest  
1623 record of Neotropical rainforest. *Proc. Natl. Acad. Sci. USA.* 106:18627–18632.
- 1624 Wojciechowski M.F., Lavin M., Sanderson M.J. 2004. A phylogeny of legumes  
1625 (Leguminosae) based on analysis of the plastid matK gene resolves many well-  
1626 supported subclades within the family. *Am. J. Bot.* 91(11):1846–1862.
- 1627 Wong M.L.L., Vaillancourt R.E., Freeman J.S., Hudson C.J., Bakker FT., Cannon C.H.,  
1628 Ratnam W. 2017. Novel insights into karyotype evolution and whole genome  
1629 duplications in legumes. *BioRxiv.* 099044.

78

PHYLOGENOMIC COMPLEXITY AND POLYPLOIDY IN LEGUMES

- 1630 Xing Y.X., Onstein R.E., Carter R.J., Stadler T., Linder H.P. 2014. Fossils and a large  
1631 molecular phylogeny show that the evolution of species richness, generic  
1632 diversity and turnover rates are disconnected. *Evolution*. 68:2821–2832.
- 1633 Yang Z. 2007. PAML 4: a program package for phylogenetic analysis by maximum  
1634 likelihood. *Mol. Biol. Evol.* 24:1586–1591.
- 1635 Yang Y., Smith S.A. 2014. Orthology inference in nonmodel organisms using  
1636 transcriptomes and low-coverage genomes: improving accuracy and matrix  
1637 occupancy for phylogenomics. *Mol. Biol. Evol.* 31:3081–3092.
- 1638 Yang Y., Moore M.J., Brockington S.F., Soltis D.E., Wong G.K., Carpenter E.J., Zhang  
1639 Y., Chen L., Yan Z., Xie Y., Sage R.F. 2015. Dissecting molecular evolution in the  
1640 highly diverse plant clade Caryophyllales using transcriptome sequencing. *Mol.*  
1641 *Biol. Evol.* 32(8):2001–2014.
- 1642 Yang Y., Moore M.J., Brockington S.F., Mikenas J., Olivieri J., Walker J.F., Smith S.A.  
1643 2018. Improved transcriptome sampling pinpoints 26 ancient and more recent  
1644 polyploidy events within Caryophyllales, including two allopolyploidy events. *New*  
1645 *Phytol.* 217:855–870.
- 1646 Zhang J., Kobert K., Flouri T., Stamatakis A. 2014. PEAR: a fast and accurate Illumina  
1647 Paired-End reAd mergeR. *Bioinformatics*. 30(5):614–620.
- 1648 Zeng L., Zhang N., Zhang Q., Endress P.K., Huang J and Ma H. 2017. Resolution of  
1649 deep eudicot phylogeny and their temporal diversification using nuclear genes  
1650 from transcriptomic and genomic datasets. *New Phytol.* 214:1338–1354.

**Table 1. Fossil calibrations used in the divergence time analyses.**

| Calibration <sup>a</sup> | Definition               | Fossil                                                                                    | Age (Ma)         |
|--------------------------|--------------------------|-------------------------------------------------------------------------------------------|------------------|
| <i>eudicots</i>          |                          |                                                                                           |                  |
| 26                       | CG eudicots              | Tricolpate pollen; England and Gabon <sup>b</sup>                                         | 126 <sup>c</sup> |
| 27                       | CG Ranunculales          | <i>Teixeiraea lusitanica</i> – flower; Portugal <sup>b</sup>                              | 113              |
| 38                       | CG Pentapetalae          | Pentamerous flower with distinct calyx and corolla; USA <sup>b</sup>                      | 100              |
| 48                       | SG Ericales              | <i>Pentapetalum trifasciculandricus</i> – flowers; USA <sup>b</sup>                       | 89.8             |
| 94                       | SG Myrtaceae             | “Flower number 3” from the Table Nunatak Formation, Antarctica <sup>b</sup>               | 83.6             |
| 105                      | SG Brassicales           | <i>Dressiantha bicarpelata</i> – flowers; USA <sup>b</sup>                                | 89.8             |
| 112                      | CG Rosaceae              | <i>Prunus wutuensis</i> – fruits; China <sup>b</sup>                                      | 49.4             |
| 116                      | SG Cannabaceae           | <i>Aphananthe cretacea</i> and <i>Gironniera gonnensis</i> – fruits; Germany <sup>b</sup> | 66               |
| 122                      | SG Juglandaceae          | <i>Polyptera manningi</i> – fruits; USA <sup>b</sup>                                      | 64.4             |
| 133                      | SG <i>Populus</i>        | <i>Populus wilmattae</i> – leaves, infructescences and fruits; USA <sup>b</sup>           | 37.8             |
| X14                      | SG Fagales               | <i>Protofagacea allonensis</i> – flowers; USA <sup>d</sup>                                | 83.6             |
| <i>legumes</i>           |                          |                                                                                           |                  |
| A                        | SG Leguminosae           | <i>Paracacioxylon frenguellii</i> – wood with vested pits; Argentina <sup>e</sup>         | 63.5             |
| C                        | SG <i>Cercis</i>         | <i>Cercis parvifolia</i> – leaves and <i>C. herbmeieri</i> – fruits; USA <sup>f</sup>     | 36               |
| C <sup>g</sup>           | SG <i>Bauhinia</i>       | cf. <i>Bauhinia</i> – simple leaf with bilobed lamina; Tanzania <sup>h</sup>              | 46               |
| F                        | SG Resin-producing clade | <i>Hymenaea mexicana</i> – vegetative and floral remains in amber; Mexico <sup>i</sup>    | 22.5             |
| G                        | SG Detarioideae          | <i>Aulacoxylon sparnacense</i> – wood and                                                 | 53               |



80

PHYLOGENOMIC COMPLEXITY AND POLYPLOIDY IN LEGUMES

| amber; France <sup>j</sup> |                                    |                                                                                            |      |
|----------------------------|------------------------------------|--------------------------------------------------------------------------------------------|------|
| G <sup>g</sup>             | SG Resin-producing clade           | same as G                                                                                  | 53   |
| H <sup>g</sup>             | CG Amherstieae                     | <i>Aphanocalyx singidaensis</i> – bifoliolate leaves; Tanzania <sup>k</sup>                | 46   |
| I2                         | SG <i>Styphnolobium/Cladrastis</i> | <i>Styphnolobium</i> and <i>Cladrastis</i> – leaves and fruits; USA <sup>l</sup>           | 37.8 |
| M2                         | SG Robinioid clade                 | <i>Robinia zirkelii</i> – wood; USA <sup>m</sup>                                           | 33.9 |
| Q                          | SG Acacieae/Ingeae                 | Flattened polyads with 16 pollen grains; Brazil, Colombia, Cameroon and Egypt <sup>n</sup> | 33.9 |
| Q2                         | SG <i>Acacia</i> s.s.              | Polyads with pseudocolpi; Australia <sup>o</sup>                                           | 23   |
| Z                          | SG Caesalpinioideae                | Bipinnate leaves; Colombia <sup>p</sup>                                                    | 58   |

1651

1652 CG = Crown group; SG = Stem group; Ma = Million years ago.

1653 <sup>a</sup> numbers 26, 27, 38, 48, 94, 105, 112, 116, 122 and 133 refer to calibrations from Magallón et al. (2015)

1654 as listed in their Supplementary Information Methods S1; letters A, D, F, G, I2, M2 and Q refer to

1655 calibrations from Bruneau et al. (2008) and/or Simon et al. (2009)

1656 <sup>b</sup> Magallón et al. (2015) and references therein

1657 <sup>c</sup> prior set as normal with standard deviation of 1.0, and truncated between minimum and maximum

1658 bounds of 113 and 136 Ma, respectively

1659 <sup>d</sup> Xing et al. (2014) and reference therein

1660 <sup>e</sup> Brea et al. (2008)

1661 <sup>f</sup> Jia & Manchester (2014)

1662 <sup>g</sup> alternative prior 1 as used in FLC analysis with 8 local clocks

1663 <sup>h</sup> Jacobs & Herendeen (2004)

1664 <sup>i</sup> Poinar & Brown (2002)

1665 <sup>j</sup> De Franceschi & De Ploëg (2003)

1666 <sup>k</sup> Herendeen & Jacobs (2000)

1667 <sup>l</sup> Herendeen (1992)

1668 <sup>m</sup> Lavin et al. (2003) and references therein

1669 <sup>n</sup> Simon et al. (2009): Supplementary Information and references therein

1670 <sup>o</sup> Miller et al. (2013)

1671 <sup>p</sup> Wing et al. (2009)

81 KOENEN ET AL.

1672 **Figure captions**

1673 FIGURE 1. Diversity, ecology and economic importance of legumes. The family is  
1674 subdivided into subfamilies (A) Cercidoideae (*Bauhinia madagascariensis*), (B)  
1675 Detarioideae (*Macrolobium* sp.), (C) Duparquetioideae (*Duparquetia orchidacea*), (D)  
1676 Dialioideae (*Baudouinia* sp.), (E) Caesalpinioideae (*Mimosa pectinatipinna*) and (F)  
1677 Papilionoideae (*Medicago marina*). While the family has a very diverse floral  
1678 morphology, the fruit (G), which comes in many shapes and is most often referred to as  
1679 'pod' or 'legume', is the defining feature of the family (fruit shown is of *Brodriguesia*  
1680 *santosii*). A large fraction of legume species is known to fix atmospheric nitrogen  
1681 symbiotically with 'rhizobia', bacteria that are incorporated in root nodules, for example  
1682 in *Lupinus nubigenus* (H). Economically, the family is the second most important of  
1683 flowering plants after the grasses, with a wide array of uses, including timber,  
1684 ornamentals, fodder crops, and notably, pulse crops such as peanuts (*Arachis*), beans  
1685 (*Phaseolus*), chickpeas (*Cicer*) and lentils (*Lens*) (I). Also ecologically, legumes are  
1686 extremely diverse and important, occurring and often dominating globally across  
1687 disparate ecosystems, including wet tropical forest, for example *Albizia grandibracteata*  
1688 in the East African Albertine Rift (J), savannas, seasonally dry tropical forests, and semi-  
1689 arid thorn-scrub, for example *Mimosa delicatula* in Madagascar (K) and temperate  
1690 woodlands and grasslands, for example *Vicia sylvatica* in the European Alps (L). --  
1691 Photos A, B, D, F, J, K, L by Erik Koenen, C by Jan Wieringa and E, G, H, I by Colin  
1692 Hughes.

82

## PHYLOGENOMIC COMPLEXITY AND POLYPLOIDY IN LEGUMES

1693 FIGURE 2. Phylogeny of legumes based on Bayesian analyses of 72 protein coding  
1694 chloroplast genes under the CATGTR model in Phylobayes. (A) majority-rule consensus  
1695 tree of the amino acid alignment, showing only the Fabales portion of the tree, outgroup  
1696 taxa pruned, (B) complete tree including outgroup taxa, (C) Root-to-tip lengths  
1697 measured from the legume crown node in amino acid substitutions per site and (D)  $D_n/$   
1698  $D_s$  ratios for background, the 50 Kb inversion clade (excluding the vicioid clade) and  
1699 vicioid clade tree partitions. Majority-rule consensus trees for both the amino acid and  
1700 nucleotide alignments with tip labels for all taxa and support values indicated are  
1701 included in supporting information (Figs S1-2).

83 KOENEN ET AL.

1702 FIGURE 3. Congruent relationships among subfamilies when using different types of  
1703 phylogenetic analysis, and phylogenetic locations of WGDs, as inferred from nuclear  
1704 gene data. Support is indicated with coloured symbols on nodes for simplicity of  
1705 presentation, as indicated in the legends; figures annotated with actual support values  
1706 are included as Figures S5-7. (A) ML phylogeny estimated with RAxML under the LG4X  
1707 model from a concatenated alignment of 1,103 nuclear orthologs. Support indicated  
1708 represents Internode Certainty All (ICA) values, estimated with RAxML from 80%  
1709 bootstrap threshold consensus gene trees of the same 1,103 orthologs. For the first four  
1710 divergences in the legume family, pie charts indicate the proportions of gene trees  
1711 supporting the relationship shown (blue), supporting the most prevalent conflicting  
1712 bipartition (yellow), supporting other conflicting bipartitions (red) and genes without  
1713 phylogenetic signal, i.e. no bootstrap support (gray). Numbers of bipartitions for the pie  
1714 charts are derived from phyparts analyses with a 50% bootstrap support filter. Labelled  
1715 nodes A-H are analysed in more detail in Figure 5. (B) Bayesian gene jackknifing  
1716 majority-rule consensus tree of concatenated alignments of c. 220 genes per replicate,  
1717 support indicated represents posterior probability averaged over 25 replicates for 500  
1718 posterior trees each (in total 12,500 posterior trees). (C) Phylogeny estimated under the  
1719 multi-species coalescent with ASTRAL from gene trees, support indicated represents  
1720 local posterior probability. Pie charts show relative quartet support for the first (blue) and  
1721 the two (yellow and red) alternative quartets. (D) Gene duplications in 8,038 homolog  
1722 clusters mapped onto the ML species tree topology. The size of the circles on nodes is

84

## PHYLOGENOMIC COMPLEXITY AND POLYPLOIDY IN LEGUMES

1723 proportional to the number of gene duplications inferred. For hypothesized WGD  
1724 events, the number of gene duplications without/with bootstrap filter is indicated. See  
1725 Figure S9 for the number of gene duplications for all nodes in the phylogeny.

85 KOENEN ET AL.

1726 FIGURE 4. A filtered supernetwork shows tangles of gene tree relationships at the bases  
1727 of the legumes, and subfamilies Detarioideae and Papilionoideae, that correspond to  
1728 WGDs. The filtered supernetwork was inferred from the 1,103 1-to-1 ortholog gene tree  
1729 set, only bipartitions that received more than 80% bootstrap support in gene tree  
1730 analyses were included. Edge lengths and colours are by their weight, a measure of  
1731 prevalence of the bipartition that the edge represents among the gene trees. Ellipses  
1732 with dashed outline indicate increased complexity at putative locations of WGDs.

86

## PHYLOGENOMIC COMPLEXITY AND POLYPLOIDY IN LEGUMES

1733 FIGURE 5. Leguminosae and its subfamilies are each supported by a large fraction of  
1734 gene trees, in contrast to relationships among the subfamilies. (A) Prevalence of  
1735 bipartitions that are equivalent to nodes A-H (see Fig. 3A), among the 3,473 gene trees  
1736 inferred from the RT homolog clusters (including 1-to-1 orthologs) in which all five  
1737 subfamilies and the outgroup were included. Numbers of bipartitions are shown as  
1738 counted from the best-scoring ML gene trees as well as taking only bipartitions with  
1739 more than 50 and 80% bootstrap support into account, as indicated in the legend. (B-D)  
1740 Prevalence of bipartitions for nodes B, E and F plotted next to the most common  
1741 alternative bipartitions. The locations of the stars in the illustrations indicate the  
1742 internodes of the phylogeny that are equivalent to the bipartitions for which counts are  
1743 plotted below, as counted from the ML estimates and for bipartitions with at least 50 or  
1744 80% bootstrap support. Colors of the stars correspond to the colors of the bars in the  
1745 barplots.

87 KOENEN ET AL.

1746 FIGURE 6. The origin of the legumes is closely associated with the KPB. (A) Chronogram  
1747 estimated with 8 fixed local clocks (FLC8 model) in BEAST, with the clock partitions  
1748 indicated by colored branches, from an alignment of 36 genes selected as both clock  
1749 like and highly informative and hence well-suited for clock analyses. Blue shading  
1750 represents 500 post-burnin trees ('densitree' plot) to indicate posterior distributions of  
1751 node ages. Yellow stars indicate putative legume WGD events. Labelled circles plotted  
1752 across the phylogeny indicate placement and age of fossil calibrations listed in Table 1.  
1753 (B) Prior and posterior distributions for the age of legumes under different clock models.  
1754 The marginal prior distribution is plotted in grey, UCLN in blue, RLC in green, STRC in  
1755 purple and FLC3 in yellow, FLC6 in orange and FLC8 in red.



88

## PHYLOGENOMIC COMPLEXITY AND POLYPLOIDY IN LEGUMES

1756 FIGURE 7. Differential loss of paralog copies combined with ILS leads to complex  
1757 patterns of gene tree evolution. Gene trees 1, 2 and 3 (red, blue and yellow,  
1758 respectively) are examples of increasingly complex hypothetical evolutionary gene  
1759 histories, as reconciled with the species tree. Gene 1 loses one paralog copy prior to  
1760 speciation, and the remaining copy yields the species tree topology in the absence of  
1761 ILS. Gene 2 is modelled on the homolog cluster2941\_1rr\_1rr (Fig. S8D), where both  
1762 duplicated copies are lost or not sampled in a few lineages and there is also ILS. Gene  
1763 3 is modelled on the homolog cluster544\_1rr\_1rr (Fig. S8F) and shows a hypothetical  
1764 evolutionary history where two rounds of pan-legume WGD occurred in quick  
1765 succession, with different paralog copies lost either early or late in some lineages and  
1766 there is also ILS. Blue ovals indicate WGD events, triangles indicate gene duplications  
1767 and circles indicate coalescences. † = gene loss, o = sampled, x = not sampled, Cerc =  
1768 Cercidoideae, Detar = Detarioideae, Dupar = Duparquetioideae, Dial = Dialioideae,  
1769 Caes = Caesalpinioideae and Pap = Papilionoideae.

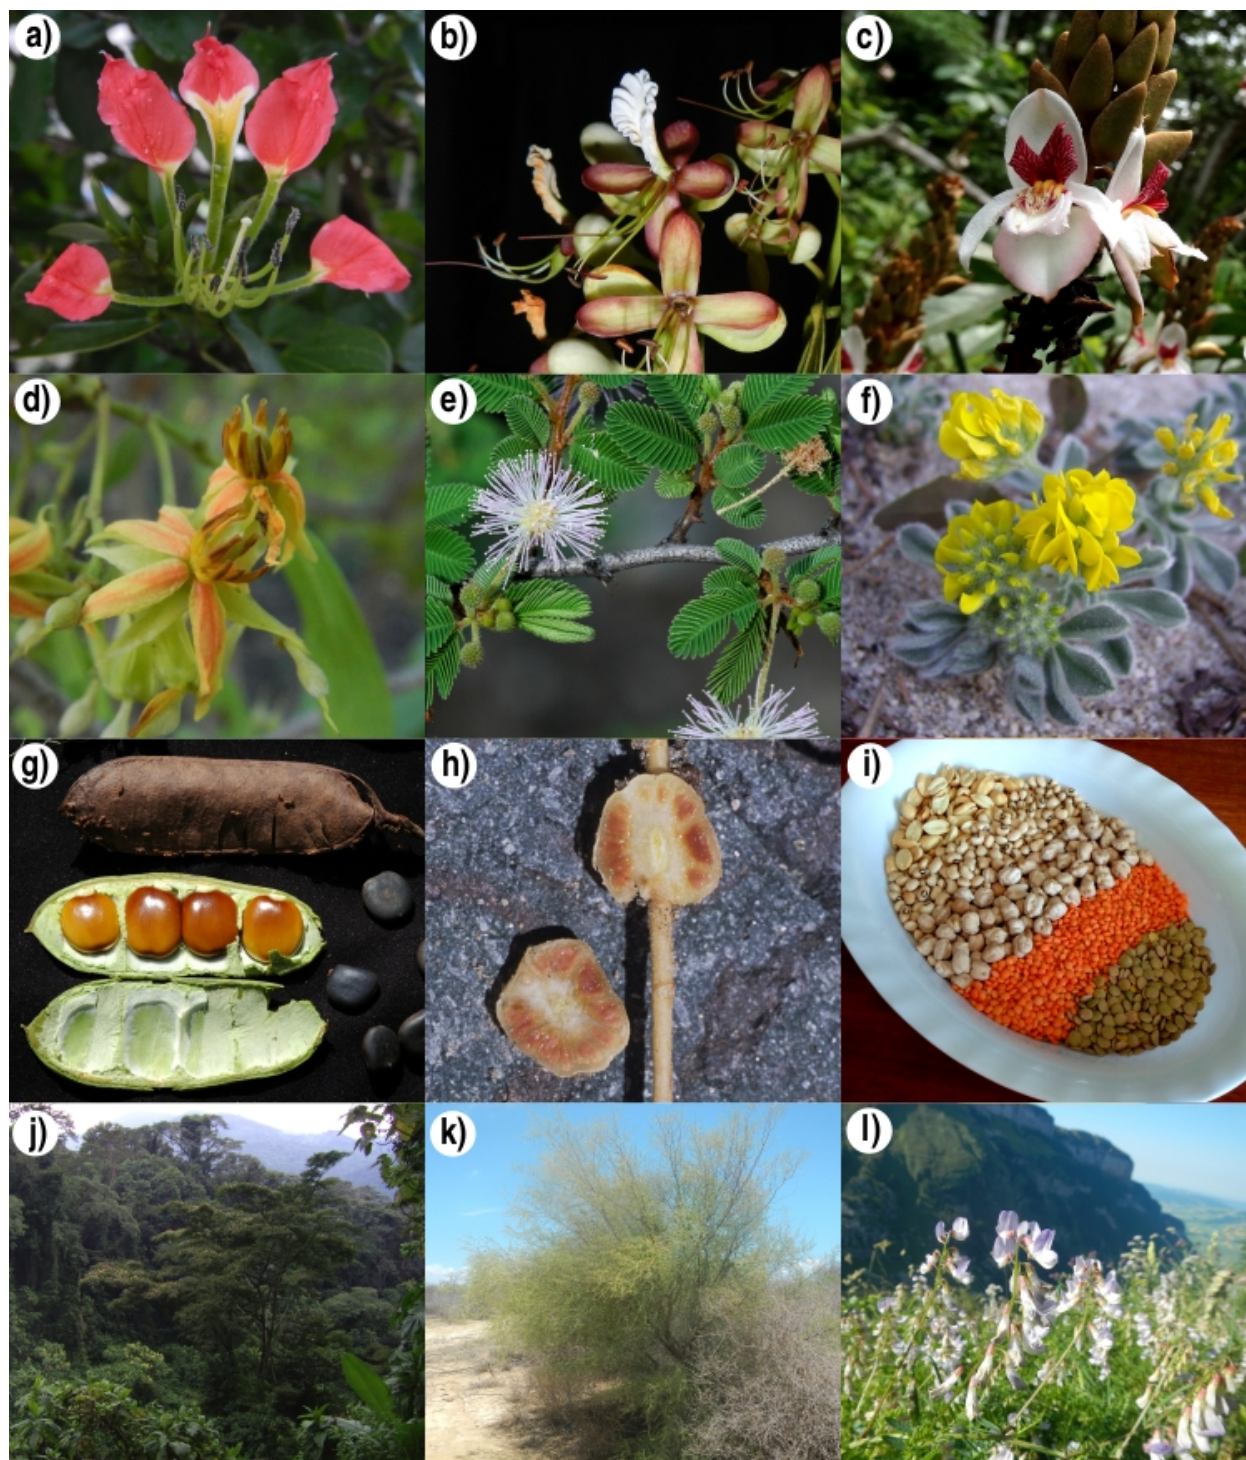

PHYLOGENOMIC COMPLEXITY AND POLYPLOIDY IN LEGUMES

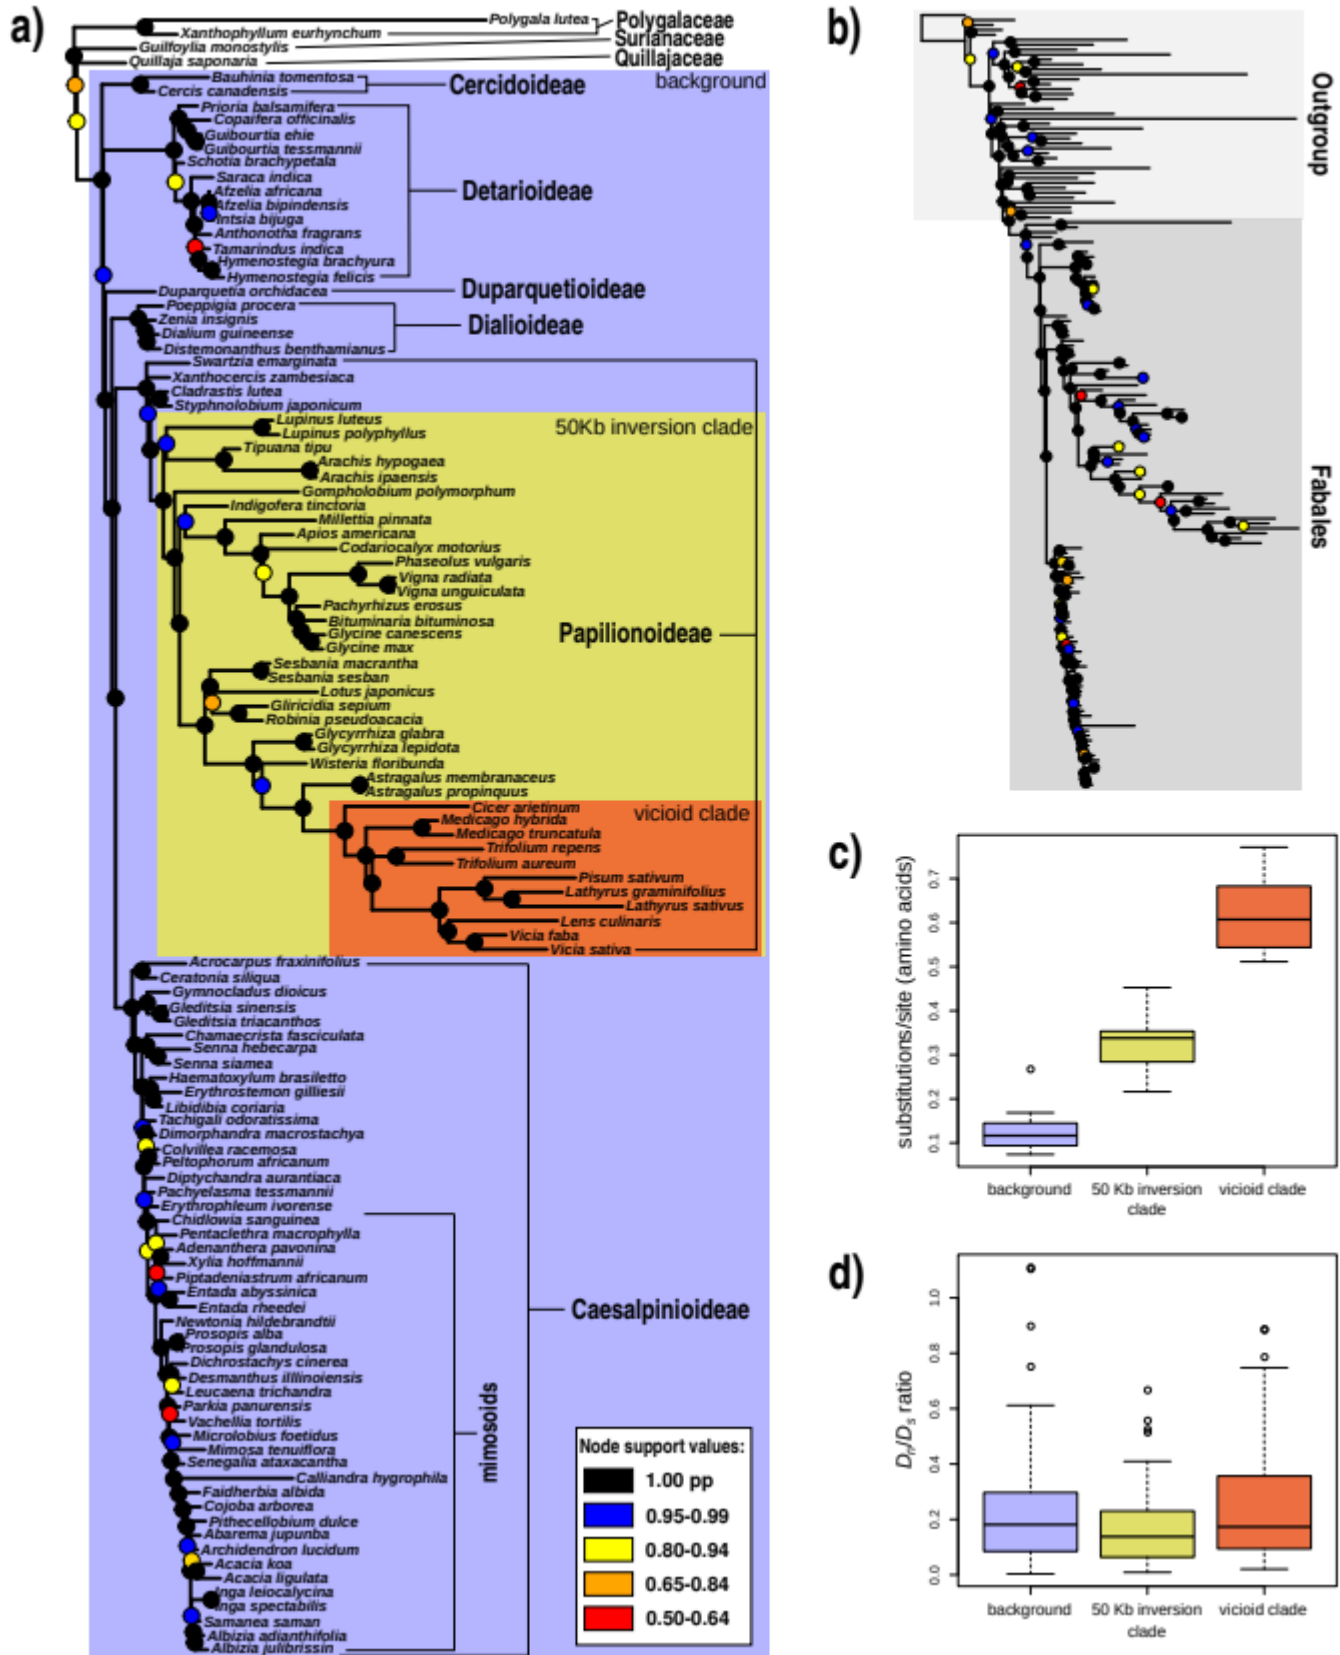

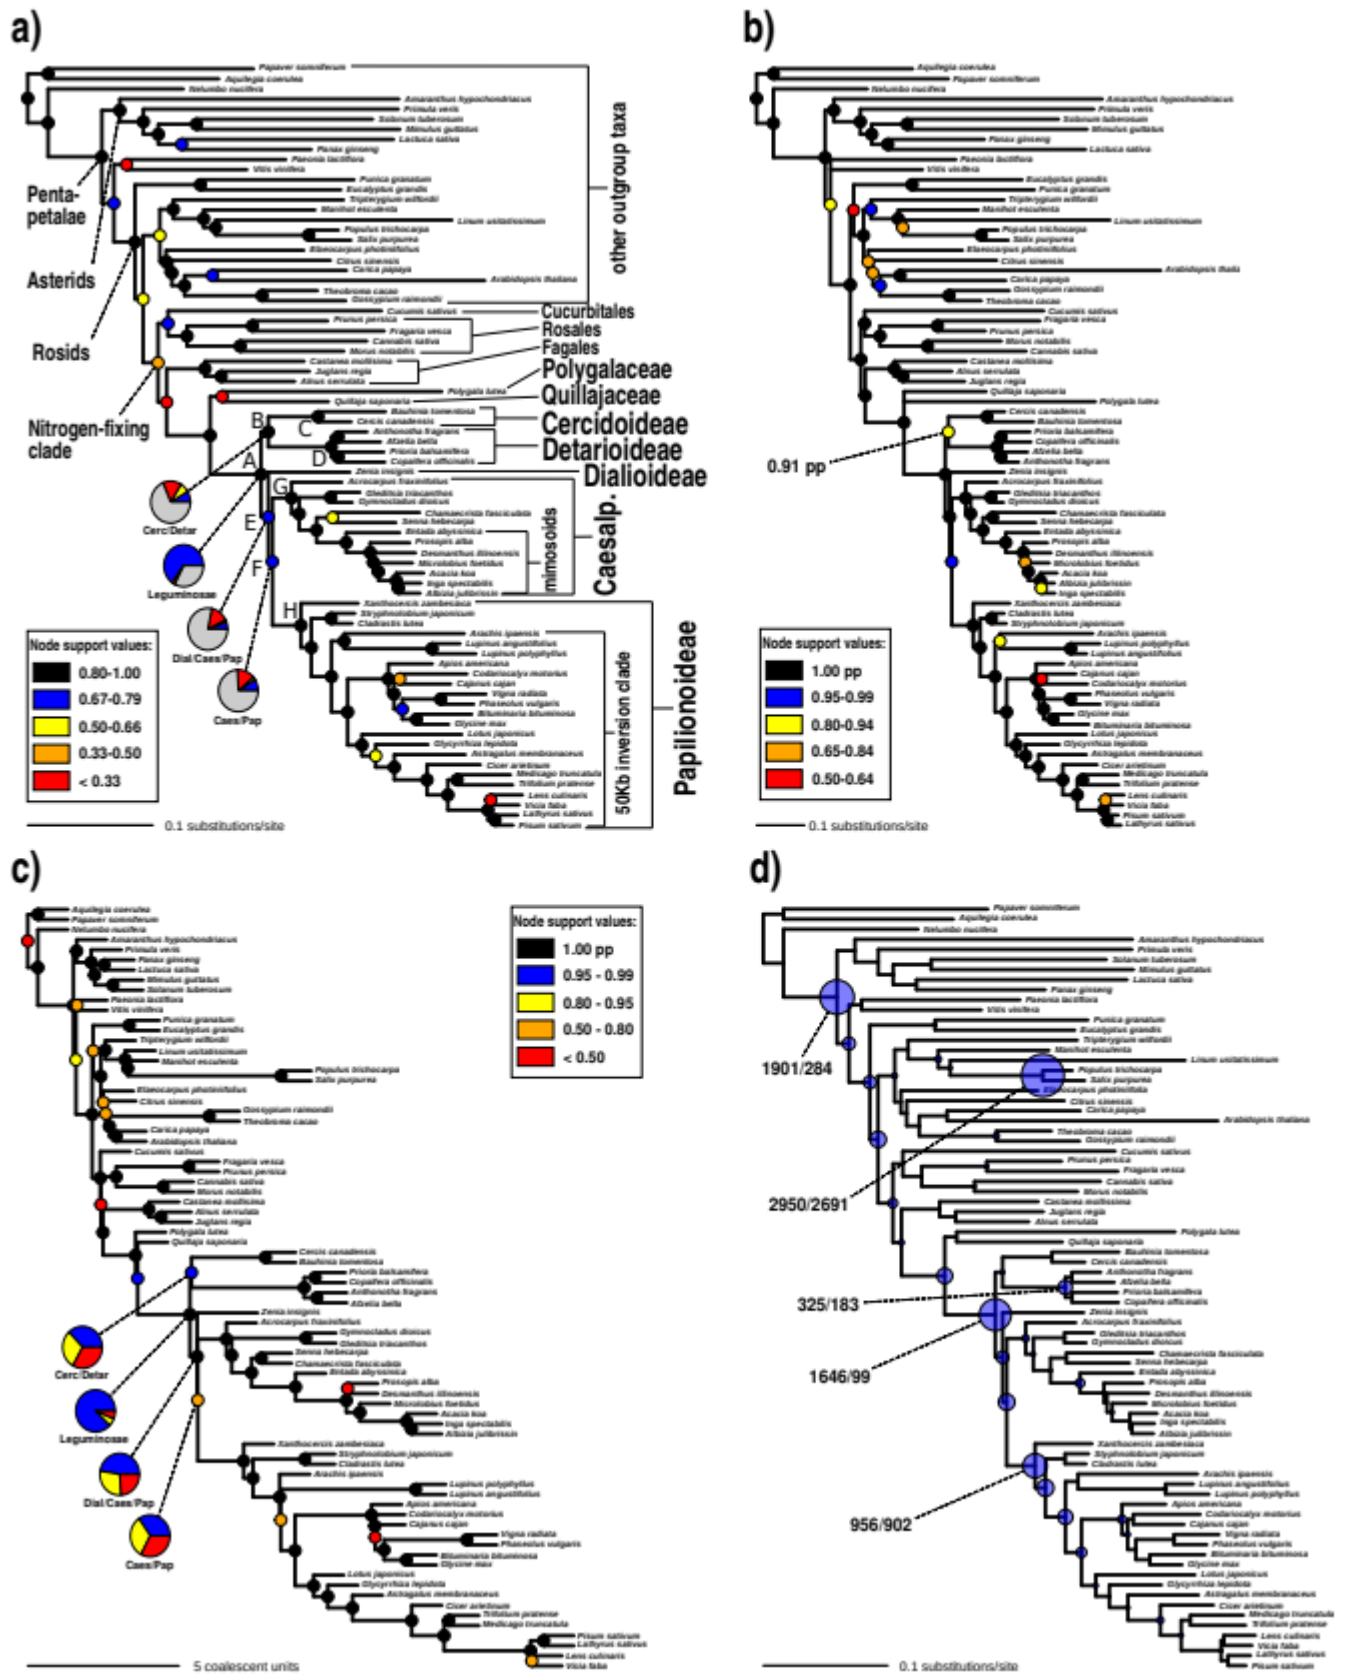

PHYLOGENOMIC COMPLEXITY AND POLYPLOIDY IN LEGUMES

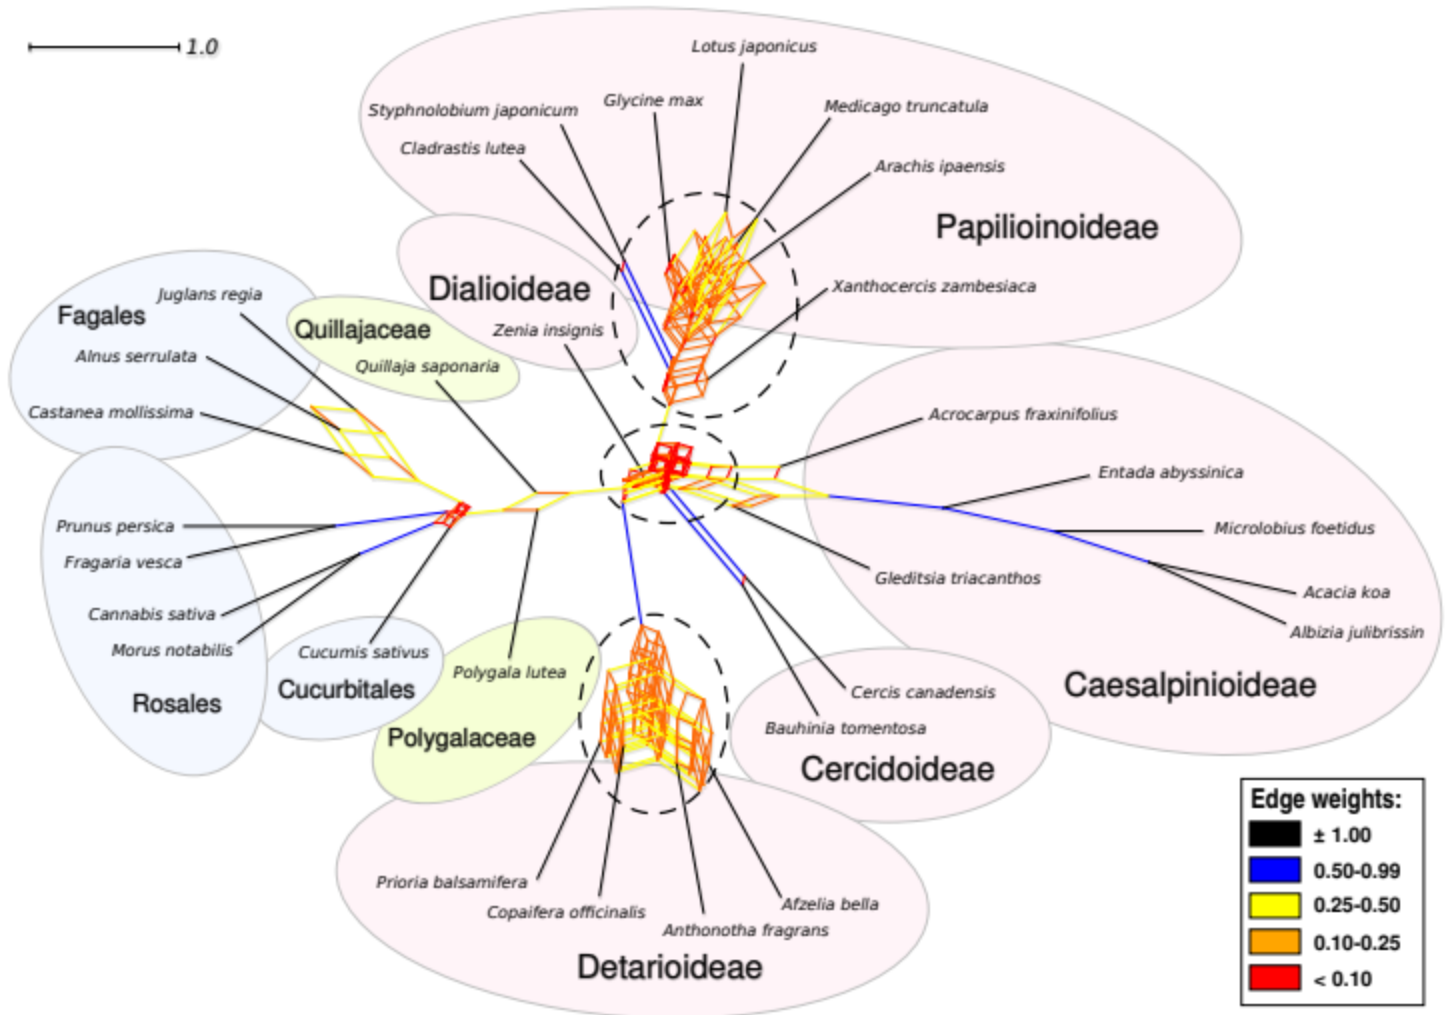

93 KOENEN ET AL.

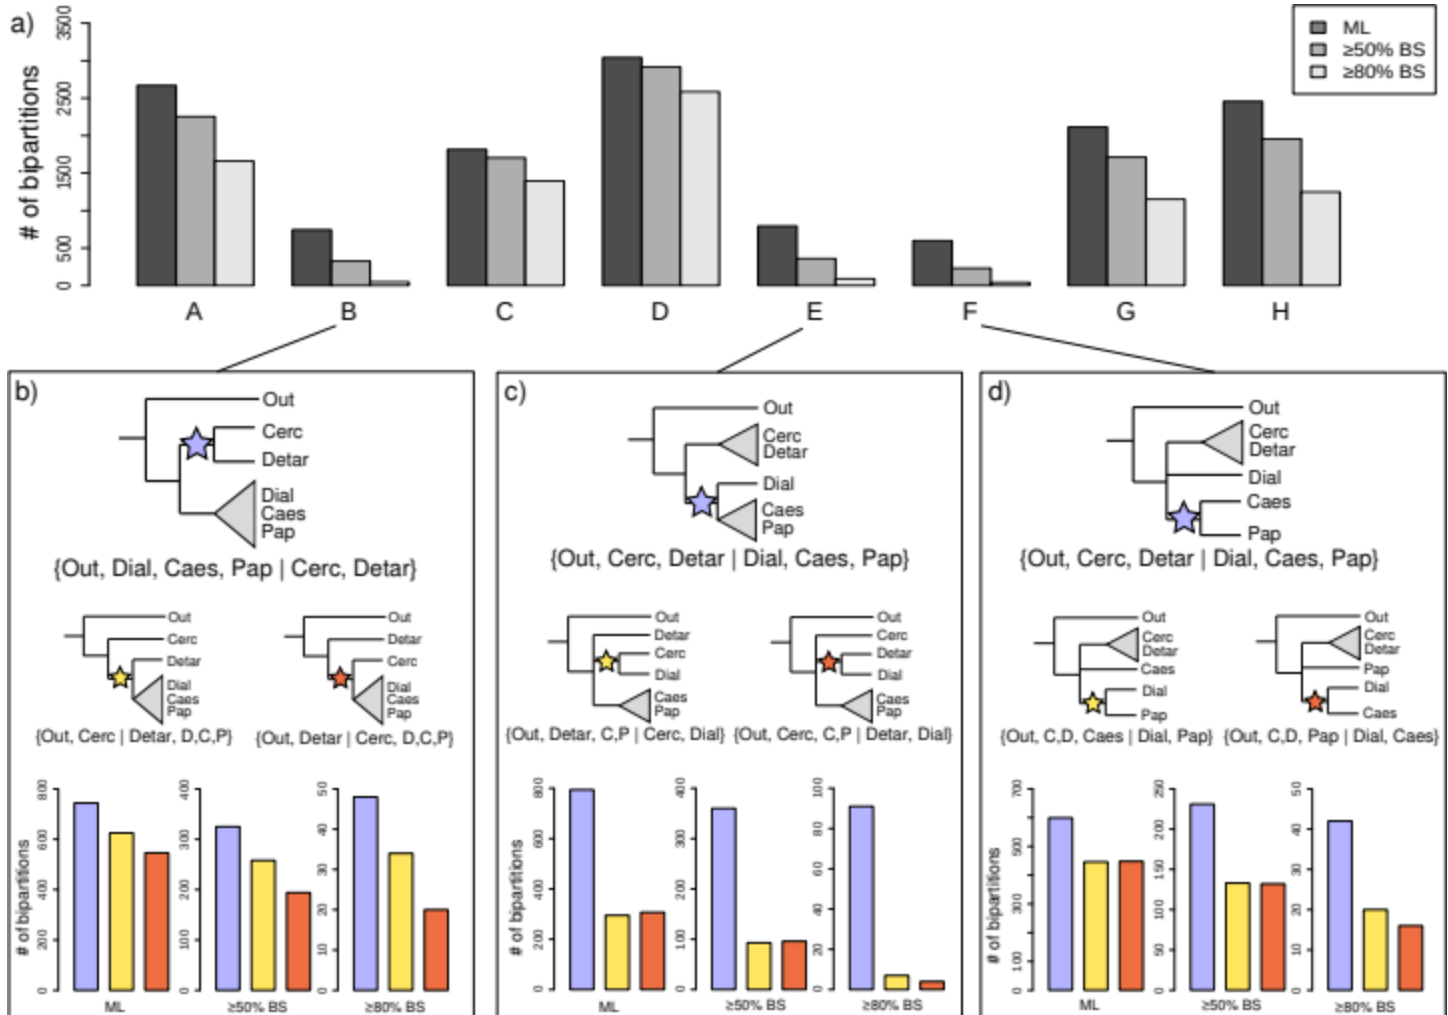

PHYLOGENOMIC COMPLEXITY AND POLYPLOIDY IN LEGUMES

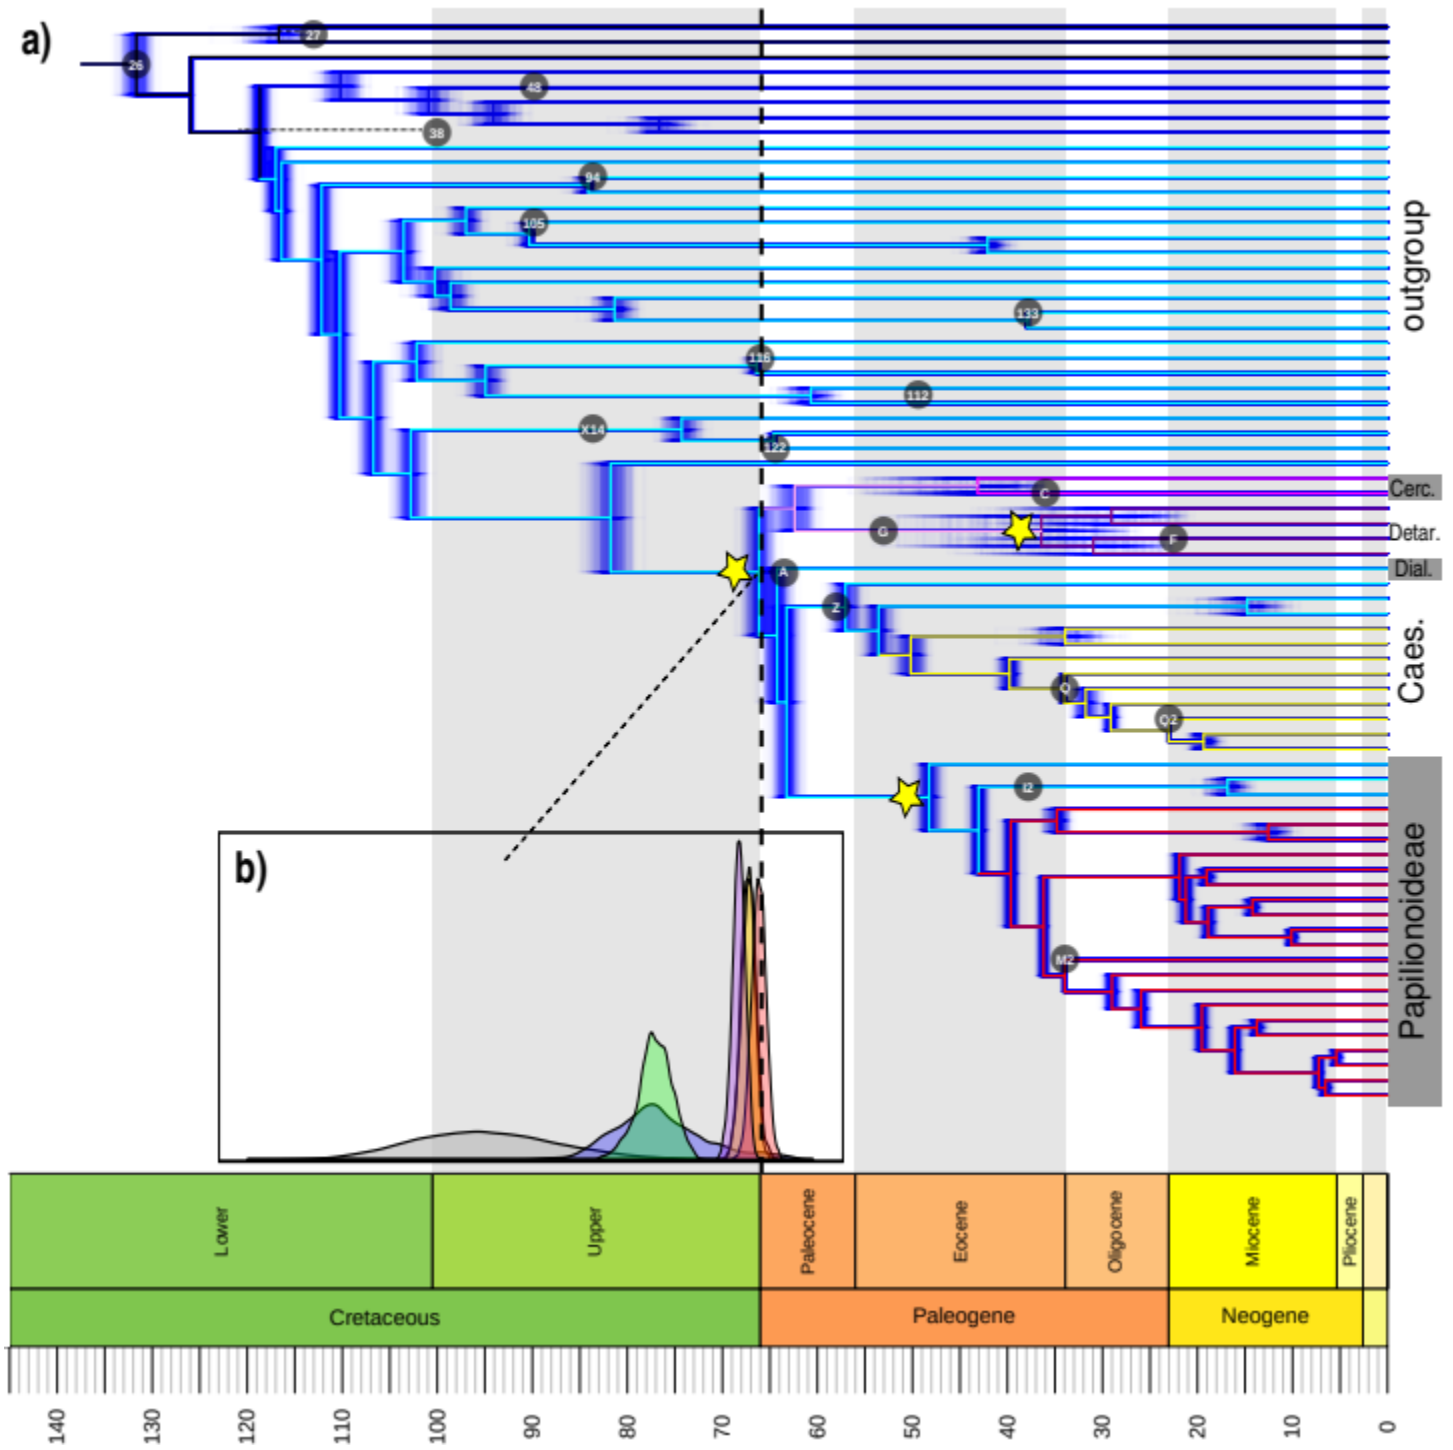

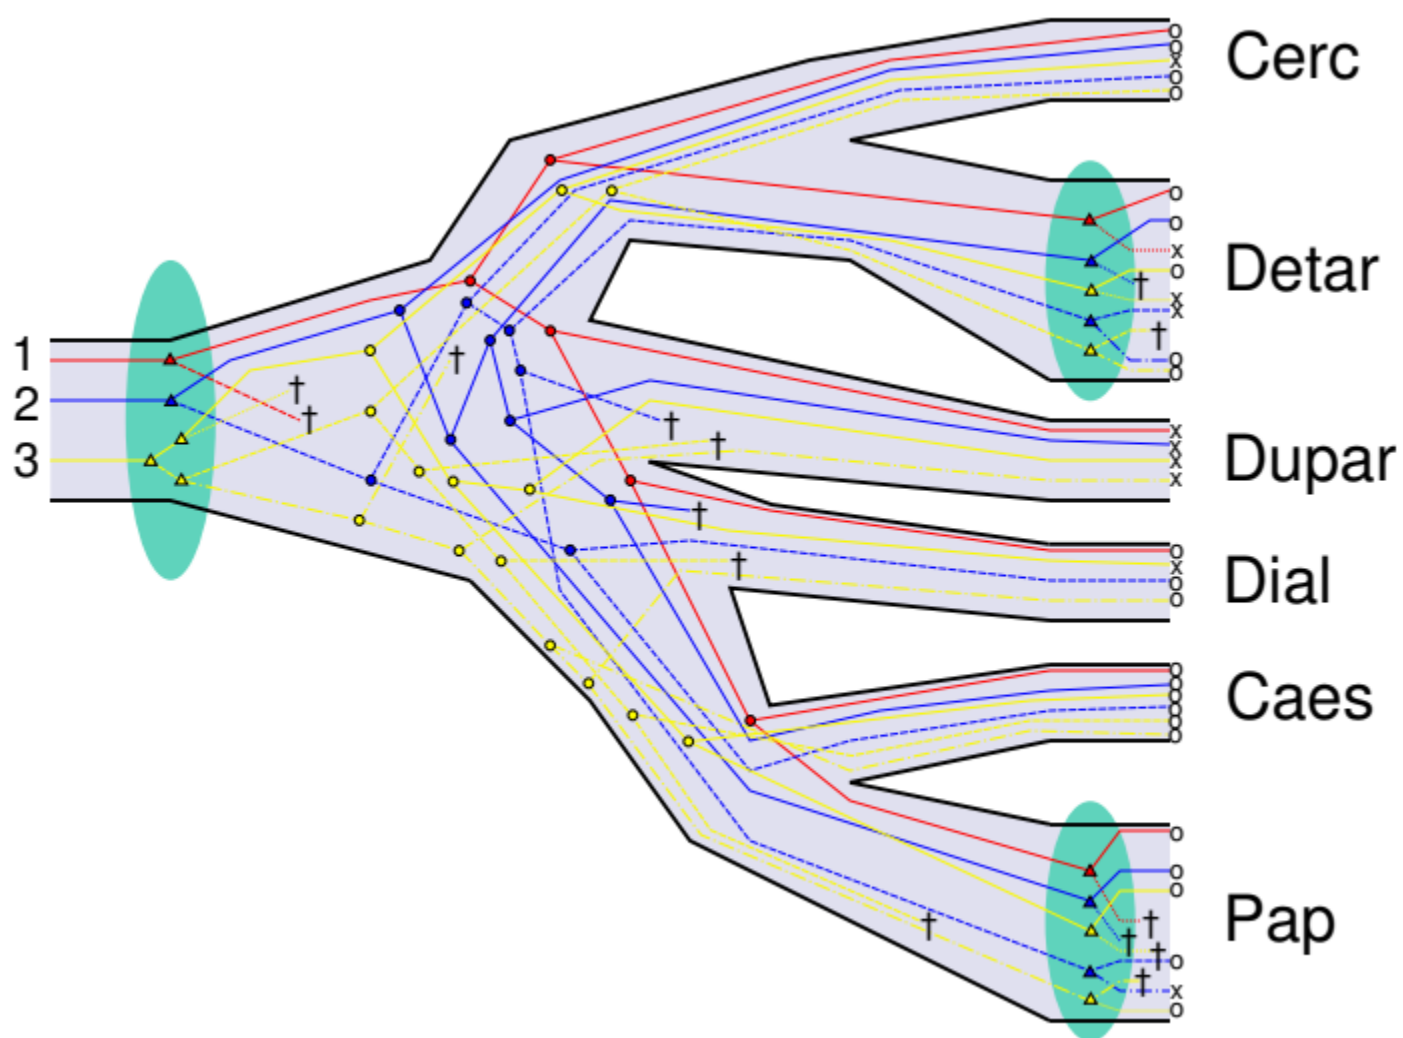



96

## PHYLOGENOMIC COMPLEXITY AND POLYPLOIDY IN LEGUMES

### 1777 **Online Appendices**

1778

1779 **Methods S1.** Discussion on fossils used for calibrating divergence time analyses.

1780

1781 **Table S1.** Accession information for the taxa included in the chloroplast alignment.

1782

1783 **Table S2.** Accession information for the taxa included in the nuclear genomic and  
1784 transcriptomic data set.

1785

1786 **Table S3.** Counts of bipartitions representing nodes A-H and conflicting bipartitions  
1787 representing other subfamily relationships among 3,473 gene trees.

1788

1789 **Table S4.** Age intervals specified for the fossil calibration priors under different  
1790 alternative priors.

1791

1792 **Table S5.** Node age estimates and priors (95% HPD intervals) of nodes A-H in the  
1793 different analyses.

1794

1795 **Figure S1.** ML topology as inferred by RAxML from amino acid alignment of chloroplast  
1796 genes under the LG4X model. Numbers on nodes indicate bootstrap percentages  
1797 estimated from 1000 replicates.

97 KOENEN ET AL.

1798

1799 **Figure S2.** Bayesian majority-rule consensus tree inferred with Phylobayes from amino  
1800 acid alignment of chloroplast genes under the CATGTR model. Numbers on nodes  
1801 indicate posterior probabilities (pp) from 9000 post-burn-in MCMC cycles.

1802

1803 **Figure S3.** ML topology as inferred by RAxML from nucleotide alignment of chloroplast  
1804 genes under the GTR + G model. Numbers on nodes indicate bootstrap percentages  
1805 estimated from 1000 replicates.

1806

1807 **Figure S4.** Bayesian majority-rule consensus tree inferred with Phylobayes from  
1808 nucleotide alignment of chloroplast genes under the CATGTR model. Numbers on  
1809 nodes indicate the posterior probabilities (pp) from 9000 post-burn-in MCMC cycles.

1810

1811 **Figure S5.** ML topology as inferred by RAxML from a concatenated alignment of 1,103  
1812 nuclear genes, under the LG4X model. Numbers on nodes indicate Internode Certainty  
1813 All (ICA) values, as estimated from gene trees of the same 1,103 genes.

1814

1815 **Figure S6.** Bayesian gene jackknifing majority-rule consensus tree inferred with  
1816 Phylobayes from a concatenated alignment of 1,103 nuclear genes. Numbers on nodes  
1817 indicate posterior probabilities (pp), averaged over 500 posterior trees each, for 25  
1818 replicates (12,500 posterior trees in total).

98

## PHYLOGENOMIC COMPLEXITY AND POLYPLOIDY IN LEGUMES

1819

1820 **Figure S7.** Phylogeny estimated under the multi-species coalescent with ASTRAL.

1821 Support values indicated represent local posterior probability (blue rectangles) and

1822 quartet support (yellow rectangles).

1823

1824 **Figure S8.** Examples of homolog clusters with gene duplications in legumes that

1825 passed the bootstrap filter. Yellow stars behind nodes indicate locations of gene

1826 duplications, numbers on nodes indicate bootstrap support. The plotted gene trees are

1827 extracted from (A) cluster3675\_1rr\_1rr, showing a duplication subtending Detarioideae,

1828 (B) cluster1032\_1rr\_1rr, showing a duplication subtending Papilionoideae, (C)

1829 cluster1248\_1rr\_1rr and (D) cluster2941\_1rr\_1rr, both with a duplication subtending the

1830 legume family. Trees for (E) cluster51\_7rr\_1rr and (F) cluster544\_1rr\_1rr show evidence

1831 of more than one duplication, including one specific to Papilionoideae in the former.

1832

1833 **Figure S9.** Numbers of gene duplications mapped across the phylogeny. The topology

1834 used is the ML topology of the nuclear concatenated alignment of 1,103 genes,

1835 duplications were counted from 8,038 homolog clusters. Numbers above branches (with

1836 blue background) and below branches (with yellow background) represent numbers of

1837 duplications and numbers of homolog trees with duplications without or with a bootstrap

1838 filter of 50%, respectively.

1839

99 KOENEN ET AL.

1840 **Figure S10.** Chronogram estimated under the UCLN clock model. Numbers behind  
1841 nodes indicate 95% HPD intervals. Substitution rate is indicated by colored branches,  
1842 as indicated by the color legend, in substitutions per site per million years. Fossil  
1843 calibrations as listed in Table 1 are indicated by blue labeled circles.

1844

1845 **Figure S11.** Chronogram estimated under the UCLN clock model, with alternative prior  
1846 2. Numbers behind nodes indicate 95% HPD intervals. Substitution rate is indicated by  
1847 colored branches, as indicated by the color legend, in substitutions per site per million  
1848 years. Fossil calibrations as listed in Table 1 are indicated by blue labeled circles.

1849

1850 **Figure S12.** Chronogram estimated under the RLC model. Numbers behind nodes  
1851 indicate 95% HPD intervals. Substitution rate is indicated by colored branches, as  
1852 indicated by the color legend, in substitutions per site per million years. Fossil  
1853 calibrations as listed in Table 1 are indicated by blue labeled circles.

1854

1855 **Figure S13.** Chronogram estimated under the FLC3 model. Numbers behind nodes  
1856 indicate 95% HPD intervals. Clock partitions are indicated by colored branches. Fossil  
1857 calibrations as listed in Table 1 are indicated by blue labeled circles.

1858

100 PHYLOGENOMIC COMPLEXITY AND POLYPLOIDY IN LEGUMES

1859 **Figure S14.** Chronogram estimated under the FLC6 model. Numbers behind nodes  
1860 indicate 95% HPD intervals. Clock partitions are indicated by colored branches. Fossil  
1861 calibrations as listed in Table 1 are indicated by blue labeled circles.

1862

1863 **Figure S15.** Chronogram estimated under the FLC8 model. Numbers behind nodes  
1864 indicate 95% HPD intervals. Clock partitions are indicated by colored branches. Fossil  
1865 calibrations as listed in Table 1 are indicated by blue labeled circles.

1866

1867 **Figure S16.** Chronogram estimated under the FLC8 model, with alternative prior 1.  
1868 Numbers behind nodes indicate 95% HPD intervals. Clock partitions are indicated by  
1869 colored branches. Fossil calibrations as listed in Table 1 are indicated by blue labeled  
1870 circles, with alternative calibrations as red circles.

1871

1872 **Figure S17.** Chronogram estimated under the STRC model. Numbers behind nodes  
1873 indicate 95% HPD intervals. Fossil calibrations as listed in Table 1 are indicated by blue  
1874 labeled circles.

1875

1876 **Figure S18.** Substitution rates as estimated in FLC8 analyses for the different clock  
1877 partitions. Boxplots for each partition for (A) alternative prior 1 and (B) the “normal” prior  
1878 setting. Colors correspond to the partitions as shown in Figures 5, S14, S15 and S18.

1879

101 KOENEN ET AL.

1880 **Figure S19.** Root-to-tip lengths per taxon with partitions of fixed local clocks indicated.

1881 Pruned taxa with outlier root-to-tip lengths are indicated with an X, partitions are

1882 indicated with colors. (A) FLC3, (B) FLC6, (C) FLC8.
